# Supplementary material
Source: PubMed Central journal article supplement (PMC5042847)
Supplement: NIHMS807316-supplement-Supp_Table_S1.pdf [file NIHMS807316-supplement-Supp_Table_S1.pdf]

**Supplemental Table 1: All detected miRNAs**

|                                          | 24 hours              |      |                           |      | 48 hours              |       |                           |       |
|------------------------------------------|-----------------------|------|---------------------------|------|-----------------------|-------|---------------------------|-------|
|                                          | <u>Viable/Control</u> |      | <u>Viable/HIC control</u> |      | <u>Viable/Control</u> |       | <u>Viable/HIC control</u> |       |
|                                          | FC                    | FDR  | FC                        | FDR  | FC                    | FDR   | FC                        | FDR   |
| <b>mmu-let-7a-2-3p</b>                   | -1.17                 | 0.49 | -1.07                     | 0.78 | -1.23                 | 0.19  | -1.35                     | 0.05* |
| <b>mmu-let-7a-5p</b>                     | -3.45                 | 0.20 | -3.09                     | 0.24 | -4.80                 | 0.03* | -5.80                     | 0.02* |
| <b>mmu-let-7b-3p</b>                     | 1.36                  | 0.18 | 1.15                      | 0.50 | 1.46                  | 0.04* | 1.32                      | 0.05* |
| <b>mmu-let-7b-5p</b>                     | -2.35                 | 0.17 | -2.15                     | 0.21 | -3.76                 | 0.04* | -4.24                     | 0.03* |
| <b>mmu-let-7c-5p</b>                     | -2.75                 | 0.21 | -2.58                     | 0.23 | -4.26                 | 0.04* | -5.16                     | 0.03* |
| <b>mmu-let-7d-3p</b>                     | 1.07                  | 0.62 | -1.02                     | 0.89 | -1.15                 | 0.47  | -1.18                     | 0.35  |
| <b>mmu-let-7d-5p</b>                     | -2.89                 | 0.12 | -2.41                     | 0.17 | -5.12                 | 0.00* | -5.69                     | 0.00* |
| <b>mmu-let-7e-5p</b>                     | -1.78                 | 0.16 | -1.45                     | 0.26 | -1.93                 | 0.01* | -1.99                     | 0.01* |
| <b>mmu-let-7f-5p</b>                     | -2.45                 | 0.19 | -2.37                     | 0.22 | -4.93                 | 0.01* | -4.60                     | 0.01* |
| <b>mmu-let-7g-5p</b>                     | -3.94                 | 0.17 | -3.21                     | 0.21 | -7.27                 | 0.00* | -7.15                     | 0.00* |
| <b>mmu-let-7i-5p</b>                     | -1.46                 | 0.32 | -1.39                     | 0.39 | -2.20                 | 0.03* | -2.38                     | 0.02* |
| <b>mmu-miR-100-5p</b>                    | -1.54                 | 0.26 | -1.67                     | 0.22 | -3.00                 | 0.00* | -2.87                     | 0.00* |
| <b>mmu-miR-101a-3p</b>                   | -1.83                 | 0.25 | -1.95                     | 0.23 | -3.60                 | 0.02* | -3.37                     | 0.03* |
| <b>mmu-miR-101a-3p/<br/>mmu-miR-101c</b> | -2.01                 | 0.17 | -2.08                     | 0.20 | -3.63                 | 0.01* | -3.22                     | 0.01* |
| <b>mmu-miR-101b-3p</b>                   | -1.38                 | 0.27 | -1.52                     | 0.22 | -2.21                 | 0.02* | -2.19                     | 0.01* |
| <b>mmu-miR-103-3p</b>                    | -2.55                 | 0.17 | -2.81                     | 0.17 | -5.98                 | 0.01* | -6.03                     | 0.01* |
| <b>mmu-miR-106a-5p</b>                   | -1.87                 | 0.16 | -2.06                     | 0.16 | -3.34                 | 0.00* | -2.99                     | 0.00* |

|                        | 24 hours              |      |                           |      | 48 hours              |       |                           |       |
|------------------------|-----------------------|------|---------------------------|------|-----------------------|-------|---------------------------|-------|
|                        | <u>Viable/Control</u> |      | <u>Viable/HIC control</u> |      | <u>Viable/Control</u> |       | <u>Viable/HIC control</u> |       |
|                        | FC                    | FDR  | FC                        | FDR  | FC                    | FDR   | FC                        | FDR   |
| <b>mmu-miR-106b-3p</b> | -1.22                 | 0.37 | -1.20                     | 0.41 | -1.48                 | 0.03* | -1.44                     | 0.01* |
| <b>mmu-miR-106b-5p</b> | -4.56                 | 0.17 | -4.69                     | 0.19 | -12.51                | 0.00* | -12.14                    | 0.00* |
| <b>mmu-miR-107-3p</b>  | -1.89                 | 0.17 | -2.27                     | 0.16 | -4.10                 | 0.00* | -4.00                     | 0.00* |
| <b>mmu-miR-10a-5p</b>  | -1.91                 | 0.26 | -1.95                     | 0.25 | -4.42                 | 0.01* | -3.68                     | 0.01* |
| <b>mmu-miR-10b-5p</b>  | -1.53                 | 0.27 | -1.83                     | 0.19 | -2.89                 | 0.00* | -2.51                     | 0.00* |
| <b>mmu-miR-1187</b>    | -1.73                 | 0.17 | -1.38                     | 0.34 | -1.23                 | 0.31  | -1.25                     | 0.17  |
| <b>mmu-miR-1192</b>    | -1.95                 | 0.17 | -1.58                     | 0.29 | -2.12                 | 0.03* | -2.12                     | 0.02* |
| <b>mmu-miR-1198-5p</b> | -1.07                 | 0.67 | -1.21                     | 0.31 | -1.44                 | 0.06  | -1.56                     | 0.01* |
| <b>mmu-miR-1224-3p</b> | -1.08                 | 0.69 | 1.09                      | 0.69 | 1.21                  | 0.21  | 1.17                      | 0.12  |
| <b>mmu-miR-1231-3p</b> | -1.04                 | 0.82 | 1.40                      | 0.21 | 1.97                  | 0.01* | 1.76                      | 0.00* |
| <b>mmu-miR-1249-3p</b> | -1.09                 | 0.63 | -1.20                     | 0.40 | -1.36                 | 0.06  | -1.56                     | 0.01* |
| <b>mmu-miR-125a-5p</b> | -2.07                 | 0.22 | -2.03                     | 0.24 | -4.46                 | 0.02* | -4.45                     | 0.02* |
| <b>mmu-miR-125b-5p</b> | -2.12                 | 0.23 | -2.15                     | 0.23 | -5.33                 | 0.03* | -5.47                     | 0.03* |
| <b>mmu-miR-1264-3p</b> | -1.31                 | 0.26 | -1.33                     | 0.27 | -1.78                 | 0.02* | -1.56                     | 0.03* |
| <b>mmu-miR-126a-3p</b> | -2.98                 | 0.25 | -2.98                     | 0.25 | -6.55                 | 0.01* | -5.76                     | 0.02* |
| <b>mmu-miR-126a-5p</b> | -2.27                 | 0.20 | -2.28                     | 0.22 | -4.39                 | 0.01* | -4.07                     | 0.01* |
| <b>mmu-miR-1306-5p</b> | 1.06                  | 0.69 | -1.04                     | 0.81 | -1.10                 | 0.42  | -1.09                     | 0.37  |
| <b>mmu-miR-130a-3p</b> | -3.94                 | 0.11 | -3.64                     | 0.16 | -10.05                | 0.00* | -7.74                     | 0.00* |
| <b>mmu-miR-130b-3p</b> | -1.16                 | 0.42 | -1.25                     | 0.28 | -1.54                 | 0.02* | -1.51                     | 0.01* |

|                                          | 24 hours              |      |                           |      | 48 hours              |       |                           |       |
|------------------------------------------|-----------------------|------|---------------------------|------|-----------------------|-------|---------------------------|-------|
|                                          | <u>Viable/Control</u> |      | <u>Viable/HIC control</u> |      | <u>Viable/Control</u> |       | <u>Viable/HIC control</u> |       |
|                                          | FC                    | FDR  | FC                        | FDR  | FC                    | FDR   | FC                        | FDR   |
| <b>mmu-miR-130b-5p</b>                   | -1.18                 | 0.43 | -1.01                     | 0.97 | 1.01                  | 0.95  | -1.06                     | 0.55  |
| <b>mmu-miR-133a-3p</b>                   | <b>-3.52</b>          | 0.16 | <b>-4.53</b>              | 0.16 | <b>-7.08</b>          | 0.00* | <b>-6.16</b>              | 0.00* |
| <b>mmu-miR-133b-3p</b>                   | <b>-3.88</b>          | 0.16 | <b>-4.70</b>              | 0.16 | <b>-7.78</b>          | 0.00* | <b>-6.68</b>              | 0.00* |
| <b>mmu-miR-135a-1-3p</b>                 | 1.33                  | 0.26 | 1.27                      | 0.35 | 1.24                  | 0.13  | 1.42                      | 0.02* |
| <b>mmu-miR-137-5p</b>                    | -1.13                 | 0.43 | -1.17                     | 0.35 | -1.13                 | 0.27  | -1.05                     | 0.64  |
| <b>mmu-miR-138-2-3p</b>                  | -1.30                 | 0.27 | -1.23                     | 0.37 | -1.53                 | 0.04* | -1.53                     | 0.02* |
| <b>mmu-miR-139-5p</b>                    | -1.57                 | 0.17 | -1.41                     | 0.23 | -1.64                 | 0.11  | -1.74                     | 0.07  |
| <b>mmu-miR-140-3p</b>                    | <b>-3.55</b>          | 0.16 | <b>-3.61</b>              | 0.17 | <b>-8.85</b>          | 0.00* | <b>-8.10</b>              | 0.00* |
| <b>mmu-miR-140-5p</b>                    | -1.42                 | 0.29 | -1.56                     | 0.23 | <b>-2.13</b>          | 0.02* | <b>-2.10</b>              | 0.02* |
| <b>mmu-miR-141-3p</b>                    | -1.26                 | 0.41 | -1.50                     | 0.23 | <b>-2.47</b>          | 0.03* | <b>-2.45</b>              | 0.02* |
| <b>mmu-miR-142-3p</b>                    | -1.46                 | 0.46 | -1.66                     | 0.32 | <b>-2.41</b>          | 0.11  | <b>-2.65</b>              | 0.11  |
| <b>mmu-miR-142-5p</b>                    | -1.65                 | 0.21 | -1.94                     | 0.17 | <b>-2.68</b>          | 0.01* | <b>-2.67</b>              | 0.01* |
| <b>mmu-miR-143-3p</b>                    | <b>-2.92</b>          | 0.25 | <b>-2.91</b>              | 0.26 | <b>-8.49</b>          | 0.05* | <b>-8.32</b>              | 0.05* |
| <b>mmu-miR-144-3p</b>                    | -1.66                 | 0.20 | <b>-2.01</b>              | 0.17 | <b>-3.37</b>          | 0.02* | <b>-2.23</b>              | 0.03* |
| <b>mmu-miR-145a-5p/<br/>mmu-miR-145b</b> | <b>-4.78</b>          | 0.17 | <b>-4.23</b>              | 0.21 | <b>-12.95</b>         | 0.01* | <b>-12.24</b>             | 0.01* |
| <b>mmu-miR-146a-5p</b>                   | <b>-2.44</b>          | 0.25 | <b>-2.77</b>              | 0.22 | <b>-5.62</b>          | 0.01* | <b>-5.74</b>              | 0.01* |
| <b>mmu-miR-146b-5p</b>                   | -1.67                 | 0.43 | -1.94                     | 0.32 | <b>-3.61</b>          | 0.03* | <b>-3.86</b>              | 0.02* |
| <b>mmu-miR-148b-3p</b>                   | -1.74                 | 0.17 | <b>-2.08</b>              | 0.16 | <b>-2.96</b>          | 0.00* | <b>-2.75</b>              | 0.00* |
| <b>mmu-miR-149-5p</b>                    | -1.25                 | 0.29 | -1.38                     | 0.21 | -1.70                 | 0.01* | -1.70                     | 0.00* |

|                         | 24 hours              |      |                           |      | 48 hours              |       |                           |       |
|-------------------------|-----------------------|------|---------------------------|------|-----------------------|-------|---------------------------|-------|
|                         | <u>Viable/Control</u> |      | <u>Viable/HIC control</u> |      | <u>Viable/Control</u> |       | <u>Viable/HIC control</u> |       |
|                         | FC                    | FDR  | FC                        | FDR  | FC                    | FDR   | FC                        | FDR   |
| <b>mmu-miR-150-5p</b>   | 1.02                  | 0.94 | 1.10                      | 0.72 | -1.03                 | 0.88  | 1.01                      | 0.94  |
| <b>mmu-miR-151-3p</b>   | -1.38                 | 0.29 | -1.57                     | 0.22 | <b>-2.30</b>          | 0.01* | <b>-2.29</b>              | 0.01* |
| <b>mmu-miR-151-5p</b>   | <b>-3.53</b>          | 0.11 | <b>-2.93</b>              | 0.16 | <b>-7.77</b>          | 0.00* | <b>-6.36</b>              | 0.00* |
| <b>mmu-miR-152-3p</b>   | <b>-2.12</b>          | 0.11 | <b>-2.06</b>              | 0.16 | <b>-3.47</b>          | 0.00* | <b>-3.28</b>              | 0.00* |
| <b>mmu-miR-155-3p</b>   | -1.07                 | 0.69 | -1.00                     | 0.99 | 1.05                  | 0.65  | -1.01                     | 0.89  |
| <b>mmu-miR-155-5p</b>   | -1.38                 | 0.40 | -1.81                     | 0.21 | <b>-2.33</b>          | 0.01* | <b>-2.35</b>              | 0.01* |
| <b>mmu-miR-15a-5p</b>   | <b>-2.88</b>          | 0.16 | <b>-3.14</b>              | 0.17 | <b>-6.23</b>          | 0.00* | <b>-5.69</b>              | 0.00* |
| <b>mmu-miR-15b-5p</b>   | <b>-4.86</b>          | 0.11 | <b>-5.50</b>              | 0.16 | <b>-10.38</b>         | 0.00* | <b>-8.61</b>              | 0.00* |
| <b>mmu-miR-16-1-3p</b>  | 1.09                  | 0.60 | 1.22                      | 0.31 | 1.37                  | 0.03* | 1.32                      | 0.03* |
| <b>mmu-miR-16-5p</b>    | <b>-5.28</b>          | 0.16 | <b>-4.71</b>              | 0.17 | <b>-18.29</b>         | 0.00* | <b>-14.82</b>             | 0.00* |
| <b>mmu-miR-17-3p</b>    | 1.08                  | 0.70 | 1.10                      | 0.68 | -1.23                 | 0.13  | -1.17                     | 0.14  |
| <b>mmu-miR-17-5p</b>    | <b>-2.09</b>          | 0.17 | <b>-2.29</b>              | 0.17 | <b>-4.69</b>          | 0.00* | <b>-4.17</b>              | 0.00* |
| <b>mmu-miR-181a-5p</b>  | <b>-2.98</b>          | 0.18 | <b>-3.28</b>              | 0.19 | <b>-7.15</b>          | 0.02* | <b>-6.93</b>              | 0.02* |
| <b>mmu-miR-181b-5p</b>  | <b>-2.05</b>          | 0.17 | <b>-2.18</b>              | 0.17 | <b>-4.01</b>          | 0.00* | <b>-3.88</b>              | 0.00* |
| <b>mmu-miR-181d-5p</b>  | <b>-2.01</b>          | 0.12 | -1.92                     | 0.16 | <b>-2.98</b>          | 0.00* | <b>-2.74</b>              | 0.00* |
| <b>mmu-miR-183-3p</b>   | <b>3.86</b>           | 0.16 | <b>3.22</b>               | 0.17 | <b>4.65</b>           | 0.00* | <b>4.43</b>               | 0.00* |
| <b>mmu-miR-1839-3p</b>  | -1.45                 | 0.20 | -1.45                     | 0.21 | <b>-2.17</b>          | 0.00* | <b>-2.00</b>              | 0.00* |
| <b>mmu-miR-184-5p</b>   | -1.37                 | 0.39 | -1.34                     | 0.42 | <b>-2.20</b>          | 0.07  | <b>-2.14</b>              | 0.08  |
| <b>mmu-miR-1843a-3p</b> | -1.61                 | 0.12 | -1.45                     | 0.17 | -1.59                 | 0.01* | -1.37                     | 0.02* |

|                         | 24 hours              |      |                           |      | 48 hours              |       |                           |       |
|-------------------------|-----------------------|------|---------------------------|------|-----------------------|-------|---------------------------|-------|
|                         | <u>Viable/Control</u> |      | <u>Viable/HIC control</u> |      | <u>Viable/Control</u> |       | <u>Viable/HIC control</u> |       |
|                         | FC                    | FDR  | FC                        | FDR  | FC                    | FDR   | FC                        | FDR   |
| <b>mmu-miR-1843a-5p</b> | -2.34                 | 0.12 | -2.19                     | 0.16 | -4.40                 | 0.00* | -3.68                     | 0.00* |
| <b>mmu-miR-1843b-3p</b> | 6.40                  | 0.11 | 6.23                      | 0.16 | 13.30                 | 0.00* | 10.64                     | 0.00* |
| <b>mmu-miR-1843b-5p</b> | -2.18                 | 0.12 | -2.08                     | 0.16 | -3.54                 | 0.00* | -2.97                     | 0.00* |
| <b>mmu-miR-185-3p</b>   | 1.27                  | 0.22 | 1.16                      | 0.41 | 1.25                  | 0.24  | 1.15                      | 0.25  |
| <b>mmu-miR-185-5p</b>   | -1.61                 | 0.17 | -1.72                     | 0.17 | -2.69                 | 0.00* | -2.64                     | 0.00* |
| <b>mmu-miR-186-5p</b>   | -1.23                 | 0.38 | -1.32                     | 0.28 | -1.70                 | 0.02* | -1.68                     | 0.01* |
| <b>mmu-miR-187-3p</b>   | -1.51                 | 0.17 | -1.59                     | 0.19 | -2.10                 | 0.00* | -2.22                     | 0.00* |
| <b>mmu-miR-1892</b>     | 1.53                  | 0.23 | 1.28                      | 0.42 | 1.26                  | 0.15  | 1.31                      | 0.07  |
| <b>mmu-miR-1894-3p</b>  | 2.77                  | 0.12 | 2.28                      | 0.17 | 2.72                  | 0.00* | 2.76                      | 0.00* |
| <b>mmu-miR-1894-5p</b>  | -1.01                 | 0.94 | -1.04                     | 0.84 | -1.18                 | 0.21  | -1.21                     | 0.09  |
| <b>mmu-miR-1895</b>     | 1.20                  | 0.29 | 1.26                      | 0.24 | 1.52                  | 0.01* | 1.51                      | 0.01* |
| <b>mmu-miR-1896</b>     | -1.07                 | 0.68 | -1.14                     | 0.47 | -1.23                 | 0.09  | -1.15                     | 0.16  |
| <b>mmu-miR-1897-5p</b>  | 1.49                  | 0.24 | 2.08                      | 0.17 | 3.47                  | 0.01* | 2.97                      | 0.00* |
| <b>mmu-miR-1900</b>     | 1.34                  | 0.29 | 1.43                      | 0.21 | 1.85                  | 0.00* | 1.83                      | 0.00* |
| <b>mmu-miR-1903</b>     | 1.13                  | 0.45 | 1.16                      | 0.40 | 1.34                  | 0.04* | 1.20                      | 0.10  |
| <b>mmu-miR-1904</b>     | -1.03                 | 0.82 | -1.04                     | 0.81 | 1.12                  | 0.31  | 1.13                      | 0.19  |
| <b>mmu-miR-190a-5p</b>  | -1.18                 | 0.40 | -1.29                     | 0.24 | -1.54                 | 0.03* | -1.43                     | 0.02* |
| <b>mmu-miR-191-5p</b>   | -4.66                 | 0.13 | -4.55                     | 0.16 | -11.14                | 0.00* | -10.62                    | 0.00* |
| <b>mmu-miR-1929-5p</b>  | -1.75                 | 0.17 | -1.45                     | 0.30 | -2.04                 | 0.01* | -1.91                     | 0.01* |

|                                             | 24 hours              |      |                           |      | 48 hours              |       |                           |       |
|---------------------------------------------|-----------------------|------|---------------------------|------|-----------------------|-------|---------------------------|-------|
|                                             | <u>Viable/Control</u> |      | <u>Viable/HIC control</u> |      | <u>Viable/Control</u> |       | <u>Viable/HIC control</u> |       |
|                                             | FC                    | FDR  | FC                        | FDR  | FC                    | FDR   | FC                        | FDR   |
| <b>mmu-miR-1934-5p</b>                      | 1.30                  | 0.26 | 1.25                      | 0.31 | 1.88                  | 0.01* | 1.70                      | 0.02* |
| <b>mmu-miR-193a-3p</b>                      | -1.82                 | 0.17 | -2.14                     | 0.17 | -3.19                 | 0.00* | -3.04                     | 0.00* |
| <b>mmu-miR-1941-3p</b>                      | 2.29                  | 0.11 | 2.17                      | 0.16 | 3.21                  | 0.01* | 3.02                      | 0.01* |
| <b>mmu-miR-1946a</b>                        | -1.24                 | 0.25 | -1.20                     | 0.35 | -1.35                 | 0.05* | -1.40                     | 0.03* |
| <b>mmu-miR-1946b</b>                        | -1.18                 | 0.44 | -1.23                     | 0.37 | -1.40                 | 0.03* | -1.38                     | 0.02* |
| <b>mmu-miR-1947-3p</b>                      | 6.44                  | 0.11 | 5.91                      | 0.16 | 13.52                 | 0.01* | 11.39                     | 0.01* |
| <b>mmu-miR-1948-5p</b>                      | 1.00                  | 1.00 | 1.08                      | 0.63 | 1.18                  | 0.18  | 1.20                      | 0.14  |
| <b>mmu-miR-1949</b>                         | -1.62                 | 0.26 | -1.72                     | 0.22 | -2.86                 | 0.00* | -2.51                     | 0.00* |
| <b>mmu-miR-1952</b>                         | 1.14                  | 0.65 | 1.31                      | 0.38 | 1.60                  | 0.01* | 1.41                      | 0.03* |
| <b>mmu-miR-1954</b>                         | 1.20                  | 0.40 | 1.41                      | 0.22 | 1.83                  | 0.00* | 1.58                      | 0.01* |
| <b>mmu-miR-1957a</b>                        | -1.54                 | 0.20 | -1.34                     | 0.34 | -1.51                 | 0.04* | -1.56                     | 0.02* |
| <b>mmu-miR-1958</b>                         | 1.06                  | 0.74 | 1.07                      | 0.68 | 1.23                  | 0.12  | 1.25                      | 0.08  |
| <b>mmu-miR-195a-3p</b>                      | 1.18                  | 0.34 | 1.27                      | 0.24 | 1.62                  | 0.01* | 1.57                      | 0.00* |
| <b>mmu-miR-195a-5p</b>                      | -5.66                 | 0.11 | -5.35                     | 0.16 | -13.79                | 0.00* | -10.99                    | 0.00* |
| <b>mmu-miR-1961</b>                         | -1.47                 | 0.20 | -1.48                     | 0.21 | -2.09                 | 0.01* | -2.12                     | 0.00* |
| <b>mmu-miR-1971</b>                         | 1.38                  | 0.20 | 1.21                      | 0.38 | 1.23                  | 0.16  | 1.18                      | 0.18  |
| <b>mmu-miR-1981-3p</b>                      | 2.99                  | 0.11 | 2.97                      | 0.16 | 4.48                  | 0.00* | 3.94                      | 0.00* |
| <b>mmu-miR-1983</b>                         | 1.17                  | 0.42 | 1.12                      | 0.58 | -1.01                 | 0.97  | 1.03                      | 0.89  |
| <b>mmu-miR-199a-3p/<br/>mmu-miR-199b-3p</b> | -3.95                 | 0.12 | -3.86                     | 0.16 | -9.72                 | 0.00* | -8.70                     | 0.00* |

|                        | 24 hours              |      |                           |      | 48 hours              |       |                           |       |
|------------------------|-----------------------|------|---------------------------|------|-----------------------|-------|---------------------------|-------|
|                        | <u>Viable/Control</u> |      | <u>Viable/HIC control</u> |      | <u>Viable/Control</u> |       | <u>Viable/HIC control</u> |       |
|                        | FC                    | FDR  | FC                        | FDR  | FC                    | FDR   | FC                        | FDR   |
| <b>mmu-miR-199a-5p</b> | -2.84                 | 0.17 | -3.54                     | 0.17 | -7.35                 | 0.00* | -7.97                     | 0.00* |
| <b>mmu-miR-199b-5p</b> | -1.67                 | 0.22 | -2.27                     | 0.17 | -3.45                 | 0.01* | -3.48                     | 0.00* |
| <b>mmu-miR-19a-3p</b>  | -1.35                 | 0.24 | -1.35                     | 0.25 | -1.51                 | 0.03* | -1.41                     | 0.03* |
| <b>mmu-miR-19b-3p</b>  | -1.42                 | 0.20 | -1.51                     | 0.20 | -2.12                 | 0.01* | -2.14                     | 0.01* |
| <b>mmu-miR-1a-1-5p</b> | -1.09                 | 0.58 | -1.06                     | 0.69 | 1.00                  | 0.98  | 1.08                      | 0.54  |
| <b>mmu-miR-1a-3p</b>   | -1.97                 | 0.17 | -1.99                     | 0.17 | -3.07                 | 0.01* | -2.47                     | 0.00* |
| <b>mmu-miR-200a-3p</b> | -2.15                 | 0.27 | -2.31                     | 0.25 | -5.78                 | 0.01* | -5.59                     | 0.01* |
| <b>mmu-miR-200b-3p</b> | -1.41                 | 0.35 | -1.34                     | 0.41 | -2.20                 | 0.01* | -1.94                     | 0.02* |
| <b>mmu-miR-200c-3p</b> | -1.81                 | 0.17 | -1.58                     | 0.23 | -3.51                 | 0.01* | -2.75                     | 0.01* |
| <b>mmu-miR-201-3p</b>  | -1.11                 | 0.56 | -1.04                     | 0.84 | -1.20                 | 0.16  | -1.20                     | 0.16  |
| <b>mmu-miR-204-3p</b>  | -1.10                 | 0.52 | -1.03                     | 0.85 | 1.00                  | 0.98  | 1.03                      | 0.75  |
| <b>mmu-miR-205-5p</b>  | -1.29                 | 0.40 | -1.70                     | 0.21 | -3.27                 | 0.01* | -2.51                     | 0.00* |
| <b>mmu-miR-206-3p</b>  | -1.40                 | 0.30 | -1.58                     | 0.22 | -1.99                 | 0.06  | -1.51                     | 0.03* |
| <b>mmu-miR-207</b>     | 1.04                  | 0.85 | -1.15                     | 0.50 | -1.11                 | 0.46  | -1.19                     | 0.12  |
| <b>mmu-miR-20a-5p</b>  | -1.87                 | 0.24 | -2.30                     | 0.19 | -4.20                 | 0.00* | -3.77                     | 0.00* |
| <b>mmu-miR-20b-5p</b>  | -1.49                 | 0.25 | -1.80                     | 0.19 | -2.31                 | 0.01* | -2.29                     | 0.01* |
| <b>mmu-miR-210-3p</b>  | -1.37                 | 0.34 | -1.43                     | 0.29 | -2.21                 | 0.01* | -2.12                     | 0.01* |
| <b>mmu-miR-2136</b>    | -1.08                 | 0.61 | -1.22                     | 0.31 | -1.31                 | 0.07  | -1.29                     | 0.06  |
| <b>mmu-miR-2137</b>    | 10.23                 | 0.11 | 7.11                      | 0.16 | 15.35                 | 0.00* | 13.14                     | 0.00* |

|                        | 24 hours              |      |                           |      | 48 hours              |       |                           |       |
|------------------------|-----------------------|------|---------------------------|------|-----------------------|-------|---------------------------|-------|
|                        | <u>Viable/Control</u> |      | <u>Viable/HIC control</u> |      | <u>Viable/Control</u> |       | <u>Viable/HIC control</u> |       |
|                        | FC                    | FDR  | FC                        | FDR  | FC                    | FDR   | FC                        | FDR   |
| <b>mmu-miR-2139</b>    | 1.18                  | 0.38 | 1.19                      | 0.34 | 1.76                  | 0.01* | 1.63                      | 0.01* |
| <b>mmu-miR-214-3p</b>  | -4.71                 | 0.11 | -4.03                     | 0.16 | -10.33                | 0.00* | -9.49                     | 0.00* |
| <b>mmu-miR-2183</b>    | 1.24                  | 0.21 | 1.20                      | 0.32 | 1.34                  | 0.04* | 1.40                      | 0.02* |
| <b>mmu-miR-21a-3p</b>  | 1.40                  | 0.20 | 1.15                      | 0.54 | 1.20                  | 0.26  | 1.20                      | 0.11  |
| <b>mmu-miR-21a-5p</b>  | -1.77                 | 0.52 | -2.04                     | 0.43 | -4.64                 | 0.04* | -4.82                     | 0.05* |
| <b>mmu-miR-22-3p</b>   | -1.37                 | 0.40 | -1.49                     | 0.31 | -4.46                 | 0.04* | -4.28                     | 0.04* |
| <b>mmu-miR-22-5p</b>   | -1.93                 | 0.17 | -2.08                     | 0.17 | -3.48                 | 0.00* | -3.44                     | 0.00* |
| <b>mmu-miR-221-3p</b>  | -2.01                 | 0.19 | -2.20                     | 0.19 | -4.36                 | 0.00* | -4.25                     | 0.00* |
| <b>mmu-miR-221-5p</b>  | -1.14                 | 0.49 | -1.10                     | 0.62 | -1.20                 | 0.15  | -1.21                     | 0.10  |
| <b>mmu-miR-222-3p</b>  | -1.40                 | 0.29 | -1.49                     | 0.27 | -2.39                 | 0.02* | -2.30                     | 0.01* |
| <b>mmu-miR-223-3p</b>  | -1.96                 | 0.16 | -2.27                     | 0.16 | -3.75                 | 0.00* | -3.35                     | 0.00* |
| <b>mmu-miR-224-3p</b>  | 1.42                  | 0.19 | 1.32                      | 0.27 | 1.61                  | 0.02* | 1.57                      | 0.01* |
| <b>mmu-miR-23a-3p</b>  | -6.95                 | 0.11 | -5.43                     | 0.16 | -25.30                | 0.01* | -21.05                    | 0.01* |
| <b>mmu-miR-23a-5p</b>  | 1.08                  | 0.66 | 1.20                      | 0.37 | 1.38                  | 0.03* | 1.20                      | 0.11  |
| <b>mmu-miR-23b-3p</b>  | -16.47                | 0.11 | -12.08                    | 0.16 | -62.23                | 0.00* | -52.84                    | 0.00* |
| <b>mmu-miR-24-2-5p</b> | -1.64                 | 0.13 | -1.64                     | 0.16 | -2.50                 | 0.00* | -2.35                     | 0.00* |
| <b>mmu-miR-24-3p</b>   | -10.44                | 0.12 | -9.51                     | 0.16 | -34.34                | 0.00* | -32.66                    | 0.00* |
| <b>mmu-miR-25-3p</b>   | -2.28                 | 0.17 | -2.63                     | 0.17 | -5.58                 | 0.00* | -4.79                     | 0.00* |
| <b>mmu-miR-25-5p</b>   | -1.58                 | 0.16 | -1.06                     | 0.88 | -2.44                 | 0.07  | -2.11                     | 0.12  |



|                                                                  | 24 hours              |      |                           |      | 48 hours              |       |                           |       |
|------------------------------------------------------------------|-----------------------|------|---------------------------|------|-----------------------|-------|---------------------------|-------|
|                                                                  | <u>Viable/Control</u> |      | <u>Viable/HIC control</u> |      | <u>Viable/Control</u> |       | <u>Viable/HIC control</u> |       |
|                                                                  | FC                    | FDR  | FC                        | FDR  | FC                    | FDR   | FC                        | FDR   |
| <b>mmu-miR-26a-5p</b>                                            | -2.95                 | 0.19 | -3.00                     | 0.21 | -8.49                 | 0.02* | -7.81                     | 0.02* |
| <b>mmu-miR-26b-3p</b>                                            | -1.16                 | 0.40 | -1.33                     | 0.20 | -1.50                 | 0.02* | -1.37                     | 0.03* |
| <b>mmu-miR-26b-5p</b>                                            | -5.44                 | 0.16 | -4.71                     | 0.17 | -14.11                | 0.00* | -12.42                    | 0.00* |
| <b>mmu-miR-27a-3p</b>                                            | -4.54                 | 0.17 | -5.71                     | 0.17 | -11.96                | 0.00* | -14.07                    | 0.00* |
| <b>mmu-miR-27b-3p</b>                                            | -3.89                 | 0.18 | -4.80                     | 0.17 | -9.78                 | 0.01* | -10.65                    | 0.00* |
| <b>mmu-miR-2861</b>                                              | 1.06                  | 0.69 | 1.08                      | 0.62 | 1.07                  | 0.57  | 1.06                      | 0.54  |
| <b>mmu-miR-28a-3p</b>                                            | -1.06                 | 0.77 | -1.17                     | 0.44 | -1.44                 | 0.02* | -1.33                     | 0.03* |
| <b>mmu-miR-28a-5p/<br/>mmu-miR-28c</b>                           | -4.96                 | 0.12 | -3.88                     | 0.16 | -11.96                | 0.00* | -9.30                     | 0.00* |
| <b>mmu-miR-290a-3p</b>                                           | 2.80                  | 0.12 | 2.60                      | 0.16 | 4.39                  | 0.00* | 4.03                      | 0.00* |
| <b>mmu-miR-290a-5p</b>                                           | 1.98                  | 0.21 | 1.77                      | 0.27 | 1.69                  | 0.02* | 1.84                      | 0.01* |
| <b>mmu-miR-291a-5p</b>                                           | 1.98                  | 0.17 | 1.77                      | 0.22 | 2.35                  | 0.00* | 2.12                      | 0.00* |
| <b>mmu-miR-291b-5p</b>                                           | 1.88                  | 0.19 | 1.72                      | 0.24 | 2.29                  | 0.00* | 2.11                      | 0.00* |
| <b>mmu-miR-292-3p</b>                                            | -1.16                 | 0.46 | -1.44                     | 0.19 | -1.83                 | 0.02* | -1.78                     | 0.01* |
| <b>mmu-miR-294-5p</b>                                            | 1.90                  | 0.17 | 1.91                      | 0.17 | 2.82                  | 0.00* | 2.53                      | 0.00* |
| <b>mmu-miR-296-5p</b>                                            | 1.10                  | 0.55 | -1.13                     | 0.48 | -1.06                 | 0.65  | -1.13                     | 0.37  |
| <b>mmu-miR-297a-3p/<br/>mmu-miR-297b-3p/<br/>mmu-miR-297c-3p</b> | -2.42                 | 0.16 | -1.97                     | 0.21 | -3.06                 | 0.00* | -3.07                     | 0.00* |
| <b>mmu-miR-297a-5p</b>                                           | -1.56                 | 0.17 | -1.44                     | 0.23 | -1.78                 | 0.01* | -1.70                     | 0.01* |
| <b>mmu-miR-297c-5p</b>                                           | -1.81                 | 0.17 | -1.50                     | 0.24 | -1.67                 | 0.01* | -1.71                     | 0.01* |
| <b>mmu-miR-299a-5p</b>                                           | 1.85                  | 0.13 | 1.94                      | 0.16 | 3.18                  | 0.00* | 2.89                      | 0.00* |

|                         | 24 hours              |      |                           |      | 48 hours              |       |                           |       |
|-------------------------|-----------------------|------|---------------------------|------|-----------------------|-------|---------------------------|-------|
|                         | <u>Viable/Control</u> |      | <u>Viable/HIC control</u> |      | <u>Viable/Control</u> |       | <u>Viable/HIC control</u> |       |
|                         | FC                    | FDR  | FC                        | FDR  | FC                    | FDR   | FC                        | FDR   |
| <b>mmu-miR-29a-3p</b>   | -5.35                 | 0.23 | -6.60                     | 0.21 | -20.97                | 0.01* | -22.03                    | 0.01* |
| <b>mmu-miR-29a-5p</b>   | -1.35                 | 0.22 | -1.56                     | 0.18 | -1.99                 | 0.00* | -1.89                     | 0.00* |
| <b>mmu-miR-29b-1-5p</b> | -1.23                 | 0.29 | -1.19                     | 0.37 | -1.31                 | 0.06  | -1.38                     | 0.01* |
| <b>mmu-miR-29b-3p</b>   | -2.43                 | 0.16 | -2.58                     | 0.17 | -6.35                 | 0.00* | -5.55                     | 0.00* |
| <b>mmu-miR-29c-3p</b>   | -2.44                 | 0.19 | -2.87                     | 0.19 | -6.49                 | 0.00* | -5.73                     | 0.00* |
| <b>mmu-miR-29c-5p</b>   | -1.37                 | 0.26 | -1.34                     | 0.30 | -1.73                 | 0.01* | -1.66                     | 0.01* |
| <b>mmu-miR-300-5p</b>   | 1.24                  | 0.29 | 1.47                      | 0.17 | 1.67                  | 0.01* | 1.50                      | 0.01* |
| <b>mmu-miR-302a-3p</b>  | 2.70                  | 0.11 | 2.52                      | 0.16 | 4.05                  | 0.00* | 3.49                      | 0.01* |
| <b>mmu-miR-3060-3p</b>  | -1.10                 | 0.56 | 1.11                      | 0.59 | 1.21                  | 0.22  | 1.16                      | 0.25  |
| <b>mmu-miR-3062-3p</b>  | -1.15                 | 0.46 | -1.03                     | 0.89 | 1.05                  | 0.74  | 1.00                      | 0.99  |
| <b>mmu-miR-3064-5p</b>  | -1.20                 | 0.29 | -1.09                     | 0.59 | -1.16                 | 0.20  | -1.19                     | 0.11  |
| <b>mmu-miR-3068-3p</b>  | -2.00                 | 0.25 | -2.17                     | 0.24 | -3.08                 | 0.02* | -2.40                     | 0.04* |
| <b>mmu-miR-3069-3p</b>  | -2.67                 | 0.16 | -2.45                     | 0.17 | -4.18                 | 0.00* | -3.88                     | 0.00* |
| <b>mmu-miR-3072-3p</b>  | 1.22                  | 0.32 | 1.06                      | 0.78 | -1.03                 | 0.81  | -1.07                     | 0.48  |
| <b>mmu-miR-3076-3p</b>  | 1.18                  | 0.46 | 1.15                      | 0.56 | 1.16                  | 0.22  | 1.27                      | 0.05* |
| <b>mmu-miR-3077-3p</b>  | -1.17                 | 0.40 | -1.06                     | 0.74 | 1.00                  | 0.99  | -1.01                     | 0.93  |
| <b>mmu-miR-3078-3p</b>  | 1.18                  | 0.35 | 1.18                      | 0.37 | 1.33                  | 0.06  | 1.34                      | 0.03* |
| <b>mmu-miR-3081-3p</b>  | 1.40                  | 0.17 | 1.30                      | 0.24 | 1.43                  | 0.03* | 1.43                      | 0.01* |
| <b>mmu-miR-3081-5p</b>  | 2.04                  | 0.17 | 1.79                      | 0.23 | 2.65                  | 0.00* | 2.65                      | 0.00* |

|                        | 24 hours              |      |                           |      | 48 hours              |       |                           |       |
|------------------------|-----------------------|------|---------------------------|------|-----------------------|-------|---------------------------|-------|
|                        | <u>Viable/Control</u> |      | <u>Viable/HIC control</u> |      | <u>Viable/Control</u> |       | <u>Viable/HIC control</u> |       |
|                        | FC                    | FDR  | FC                        | FDR  | FC                    | FDR   | FC                        | FDR   |
| <b>mmu-miR-3082-5p</b> | -1.30                 | 0.30 | 1.22                      | 0.57 | 1.96                  | 0.06  | 1.67                      | 0.01* |
| <b>mmu-miR-3084-3p</b> | -1.42                 | 0.46 | -1.27                     | 0.60 | -2.76                 | 0.04* | -2.01                     | 0.11  |
| <b>mmu-miR-3084-5p</b> | -1.78                 | 0.17 | -1.75                     | 0.17 | -2.83                 | 0.00* | -2.09                     | 0.01* |
| <b>mmu-miR-3090-5p</b> | 1.60                  | 0.17 | 1.42                      | 0.26 | 1.26                  | 0.10  | 1.34                      | 0.04* |
| <b>mmu-miR-3094-3p</b> | 1.64                  | 0.16 | 1.84                      | 0.16 | 1.54                  | 0.04* | 1.70                      | 0.01* |
| <b>mmu-miR-3095-3p</b> | 1.36                  | 0.28 | 1.49                      | 0.22 | 1.58                  | 0.01* | 1.56                      | 0.01* |
| <b>mmu-miR-3097-5p</b> | -1.35                 | 0.21 | -1.09                     | 0.69 | -1.10                 | 0.48  | -1.14                     | 0.20  |
| <b>mmu-miR-3098-3p</b> | 1.54                  | 0.17 | 1.85                      | 0.17 | 3.11                  | 0.00* | 2.79                      | 0.00* |
| <b>mmu-miR-3099-5p</b> | -1.13                 | 0.49 | -1.22                     | 0.31 | -1.32                 | 0.19  | -1.27                     | 0.22  |
| <b>mmu-miR-30a-3p</b>  | -2.82                 | 0.11 | -2.62                     | 0.16 | -4.60                 | 0.00* | -4.40                     | 0.00* |
| <b>mmu-miR-30a-5p</b>  | -2.74                 | 0.19 | -3.03                     | 0.20 | -7.02                 | 0.00* | -6.46                     | 0.00* |
| <b>mmu-miR-30b-3p</b>  | 1.05                  | 0.74 | 1.11                      | 0.57 | 1.40                  | 0.04* | 1.40                      | 0.01* |
| <b>mmu-miR-30b-5p</b>  | -7.65                 | 0.11 | -6.83                     | 0.16 | -19.70                | 0.00* | -17.62                    | 0.00* |
| <b>mmu-miR-30c-5p</b>  | -10.58                | 0.11 | -9.06                     | 0.16 | -24.90                | 0.00* | -21.05                    | 0.00* |
| <b>mmu-miR-30d-5p</b>  | -2.98                 | 0.17 | -3.24                     | 0.17 | -7.08                 | 0.01* | -6.96                     | 0.00* |
| <b>mmu-miR-30e-3p</b>  | -3.28                 | 0.11 | -3.32                     | 0.16 | -6.67                 | 0.00* | -5.53                     | 0.00* |
| <b>mmu-miR-30e-5p</b>  | -2.22                 | 0.23 | -2.66                     | 0.21 | -5.41                 | 0.01* | -5.19                     | 0.01* |
| <b>mmu-miR-3100-3p</b> | 1.87                  | 0.19 | 1.96                      | 0.17 | 2.89                  | 0.00* | 2.61                      | 0.00* |
| <b>mmu-miR-3102-5p</b> | 1.07                  | 0.74 | -1.12                     | 0.60 | -1.52                 | 0.07  | -1.51                     | 0.06  |

|                                            | 24 hours              |      |                           |      | 48 hours              |       |                           |       |
|--------------------------------------------|-----------------------|------|---------------------------|------|-----------------------|-------|---------------------------|-------|
|                                            | <u>Viable/Control</u> |      | <u>Viable/HIC control</u> |      | <u>Viable/Control</u> |       | <u>Viable/HIC control</u> |       |
|                                            | FC                    | FDR  | FC                        | FDR  | FC                    | FDR   | FC                        | FDR   |
| <b>mmu-miR-3103-3p</b>                     | 4.07                  | 0.12 | 4.12                      | 0.16 | 12.69                 | 0.00* | 10.22                     | 0.00* |
| <b>mmu-miR-3104-3p</b>                     | -1.14                 | 0.53 | -1.36                     | 0.25 | -1.63                 | 0.02* | -1.71                     | 0.01* |
| <b>mmu-miR-3107-5p/<br/>mmu-miR-486-5p</b> | -1.17                 | 0.47 | -1.33                     | 0.27 | -1.91                 | 0.03* | -1.46                     | 0.03* |
| <b>mmu-miR-3109-5p</b>                     | 2.12                  | 0.16 | 2.00                      | 0.17 | 3.09                  | 0.00* | 2.89                      | 0.00* |
| <b>mmu-miR-3112-3p</b>                     | -1.17                 | 0.43 | 1.00                      | 0.99 | 1.09                  | 0.49  | 1.03                      | 0.79  |
| <b>mmu-miR-32-3p</b>                       | -1.31                 | 0.29 | 1.20                      | 0.59 | 1.90                  | 0.05* | 1.59                      | 0.02* |
| <b>mmu-miR-32-5p</b>                       | -1.32                 | 0.27 | -1.47                     | 0.21 | -1.86                 | 0.02* | -1.79                     | 0.01* |
| <b>mmu-miR-320-3p</b>                      | -1.53                 | 0.29 | -1.70                     | 0.23 | -2.53                 | 0.01* | -2.48                     | 0.01* |
| <b>mmu-miR-320-5p</b>                      | 1.04                  | 0.78 | 1.20                      | 0.41 | 1.58                  | 0.01* | 1.42                      | 0.01* |
| <b>mmu-miR-322-5p</b>                      | -2.03                 | 0.12 | -2.01                     | 0.16 | -3.22                 | 0.00* | -2.85                     | 0.00* |
| <b>mmu-miR-325-3p</b>                      | 1.21                  | 0.40 | 1.32                      | 0.26 | 1.61                  | 0.09  | 1.44                      | 0.13  |
| <b>mmu-miR-326-3p</b>                      | -1.93                 | 0.17 | -2.24                     | 0.17 | -3.66                 | 0.01* | -3.72                     | 0.00* |
| <b>mmu-miR-328-3p</b>                      | -1.18                 | 0.38 | -1.24                     | 0.31 | -1.47                 | 0.07  | -1.51                     | 0.04* |
| <b>mmu-miR-329-3p</b>                      | -1.16                 | 0.46 | -1.37                     | 0.24 | -1.90                 | 0.02* | -1.92                     | 0.01* |
| <b>mmu-miR-329-5p</b>                      | 1.08                  | 0.60 | 1.11                      | 0.54 | 1.22                  | 0.13  | 1.15                      | 0.16  |
| <b>mmu-miR-33-5p</b>                       | -1.30                 | 0.31 | -1.60                     | 0.18 | -1.77                 | 0.03* | -1.80                     | 0.02* |
| <b>mmu-miR-331-3p</b>                      | -1.07                 | 0.69 | -1.25                     | 0.30 | -1.68                 | 0.04* | -1.75                     | 0.01* |
| <b>mmu-miR-335-3p</b>                      | 1.20                  | 0.38 | 1.40                      | 0.21 | 1.61                  | 0.02* | 1.67                      | 0.01* |
| <b>mmu-miR-337-3p</b>                      | -1.21                 | 0.46 | -1.31                     | 0.33 | -1.66                 | 0.03* | -1.73                     | 0.02* |

|                        | 24 hours              |      |                           |      | 48 hours              |       |                           |       |
|------------------------|-----------------------|------|---------------------------|------|-----------------------|-------|---------------------------|-------|
|                        | <u>Viable/Control</u> |      | <u>Viable/HIC control</u> |      | <u>Viable/Control</u> |       | <u>Viable/HIC control</u> |       |
|                        | FC                    | FDR  | FC                        | FDR  | FC                    | FDR   | FC                        | FDR   |
| <b>mmu-miR-338-3p</b>  | -1.67                 | 0.17 | -2.02                     | 0.16 | -2.88                 | 0.00* | -2.54                     | 0.00* |
| <b>mmu-miR-339-5p</b>  | -1.35                 | 0.42 | -1.79                     | 0.22 | -2.90                 | 0.01* | -3.15                     | 0.01* |
| <b>mmu-miR-340-5p</b>  | -1.27                 | 0.37 | -1.26                     | 0.38 | -1.65                 | 0.02* | -1.68                     | 0.01* |
| <b>mmu-miR-341-3p</b>  | 0.86                  | 0.85 | 1.02                      | 0.89 | 1.14                  | 0.26  | 1.06                      | 0.50  |
| <b>mmu-miR-344h-3p</b> | 1.15                  | 0.39 | 1.09                      | 0.57 | 1.00                  | 0.98  | -1.06                     | 0.71  |
| <b>mmu-miR-345-3p</b>  | -1.05                 | 0.75 | -1.25                     | 0.25 | -1.51                 | 0.03* | -1.37                     | 0.03* |
| <b>mmu-miR-346-3p</b>  | 1.64                  | 0.21 | 1.50                      | 0.27 | 1.30                  | 0.14  | 1.19                      | 0.16  |
| <b>mmu-miR-3470a</b>   | -1.21                 | 0.29 | -1.07                     | 0.70 | -1.12                 | 0.32  | -1.24                     | 0.06  |
| <b>mmu-miR-3470b</b>   | -1.12                 | 0.49 | 1.14                      | 0.57 | 1.33                  | 0.11  | 1.23                      | 0.05* |
| <b>mmu-miR-3473a</b>   | -1.14                 | 0.49 | -1.01                     | 0.97 | -1.77                 | 0.02* | -1.43                     | 0.01* |
| <b>mmu-miR-3473b</b>   | 3.21                  | 0.16 | 3.36                      | 0.16 | 4.27                  | 0.00* | 4.31                      | 0.00* |
| <b>mmu-miR-3473c</b>   | 1.00                  | 0.98 | -1.08                     | 0.67 | -1.13                 | 0.41  | -1.21                     | 0.16  |
| <b>mmu-miR-3474</b>    | 1.69                  | 0.21 | 1.60                      | 0.23 | 4.17                  | 0.00* | 3.11                      | 0.01* |
| <b>mmu-miR-34a-5p</b>  | -1.68                 | 0.37 | -1.89                     | 0.30 | -4.37                 | 0.02* | -4.69                     | 0.01* |
| <b>mmu-miR-34b-3p</b>  | -1.92                 | 0.16 | -1.85                     | 0.18 | -3.22                 | 0.00* | -2.87                     | 0.00* |
| <b>mmu-miR-34b-5p</b>  | -1.77                 | 0.44 | -2.10                     | 0.33 | -5.47                 | 0.02* | -5.94                     | 0.02* |
| <b>mmu-miR-34c-3p</b>  | -2.41                 | 0.11 | -2.02                     | 0.16 | -3.40                 | 0.00* | -3.10                     | 0.00* |
| <b>mmu-miR-34c-5p</b>  | -1.99                 | 0.36 | -2.25                     | 0.30 | -5.46                 | 0.02* | -5.77                     | 0.02* |
| <b>mmu-miR-350-3p</b>  | -1.55                 | 0.13 | -1.68                     | 0.16 | -1.90                 | 0.01* | -1.82                     | 0.00* |

|                                                            | 24 hours              |      |                           |      | 48 hours              |       |                           |       |
|------------------------------------------------------------|-----------------------|------|---------------------------|------|-----------------------|-------|---------------------------|-------|
|                                                            | <u>Viable/Control</u> |      | <u>Viable/HIC control</u> |      | <u>Viable/Control</u> |       | <u>Viable/HIC control</u> |       |
|                                                            | FC                    | FDR  | FC                        | FDR  | FC                    | FDR   | FC                        | FDR   |
| <b>mmu-miR-351-5p</b>                                      | -0.28                 | 0.11 | <b>2.80</b>               | 0.16 | <b>4.59</b>           | 0.00* | <b>4.38</b>               | 0.00* |
| <b>mmu-miR-3544-3p</b>                                     | <b>5.37</b>           | 0.11 | <b>4.00</b>               | 0.16 | <b>6.60</b>           | 0.00* | <b>5.93</b>               | 0.00* |
| <b>mmu-miR-3572-3p</b>                                     | 1.52                  | 0.29 | <b>2.10</b>               | 0.23 | <b>4.58</b>           | 0.00* | <b>2.72</b>               | 0.00* |
| <b>mmu-miR-361-3p</b>                                      | 1.73                  | 0.17 | 1.60                      | 0.21 | 1.55                  | 0.01* | 1.54                      | 0.01* |
| <b>mmu-miR-361-5p</b>                                      | -1.76                 | 0.21 | <b>-2.08</b>              | 0.17 | <b>-3.65</b>          | 0.00* | <b>-3.16</b>              | 0.00* |
| <b>mmu-miR-365-3p</b>                                      | -1.74                 | 0.19 | <b>-2.08</b>              | 0.17 | <b>-3.49</b>          | 0.00* | <b>-3.34</b>              | 0.00* |
| <b>mmu-miR-370-3p</b>                                      | 1.21                  | 0.35 | 1.25                      | 0.29 | 1.65                  | 0.02* | 1.61                      | 0.01* |
| <b>mmu-miR-374b-5p</b>                                     | -1.41                 | 0.21 | -1.30                     | 0.31 | <b>-2.10</b>          | 0.00* | -1.85                     | 0.00* |
| <b>mmu-miR-375-3p</b>                                      | -1.63                 | 0.24 | -1.65                     | 0.24 | <b>-2.65</b>          | 0.01* | <b>-2.54</b>              | 0.01* |
| <b>mmu-miR-377-5p</b>                                      | -1.20                 | 0.29 | -1.17                     | 0.36 | -1.10                 | 0.42  | -1.07                     | 0.48  |
| <b>mmu-miR-378a-3p</b>                                     | -1.14                 | 0.71 | -1.44                     | 0.31 | <b>-2.27</b>          | 0.08  | <b>-2.27</b>              | 0.07  |
| <b>mmu-miR-378a-3p/<br/>mmu-miR-378b/<br/>mmu-miR-378c</b> | -1.37                 | 0.49 | -1.78                     | 0.22 | <b>-2.98</b>          | 0.03* | <b>-3.12</b>              | 0.02* |
| <b>mmu-miR-378b</b>                                        | -1.29                 | 0.53 | -1.57                     | 0.25 | <b>-2.28</b>          | 0.04* | <b>-2.21</b>              | 0.03* |
| <b>mmu-miR-381-5p</b>                                      | <b>2.30</b>           | 0.11 | 1.90                      | 0.16 | <b>2.61</b>           | 0.00* | <b>2.93</b>               | 0.00* |
| <b>mmu-miR-382-5p</b>                                      | -1.18                 | 0.69 | -1.03                     | 0.94 | -1.34                 | 0.18  | -1.46                     | 0.11  |
| <b>mmu-miR-3960</b>                                        | 1.10                  | 0.55 | 1.20                      | 0.31 | 1.31                  | 0.17  | 1.36                      | 0.11  |
| <b>mmu-miR-3961</b>                                        | -1.54                 | 0.38 | -1.49                     | 0.40 | -1.88                 | 0.11  | <b>-2.13</b>              | 0.06  |
| <b>mmu-miR-3962</b>                                        | <b>-3.71</b>          | 0.16 | <b>-3.09</b>              | 0.19 | <b>-7.10</b>          | 0.00* | <b>-6.79</b>              | 0.00* |
| <b>mmu-miR-3963</b>                                        | -1.36                 | 0.17 | -1.54                     | 0.21 | <b>-2.83</b>          | 0.00* | <b>-2.86</b>              | 0.00* |

|                                                                                                            | 24 hours              |      |                           |      | 48 hours              |       |                           |       |
|------------------------------------------------------------------------------------------------------------|-----------------------|------|---------------------------|------|-----------------------|-------|---------------------------|-------|
|                                                                                                            | <u>Viable/Control</u> |      | <u>Viable/HIC control</u> |      | <u>Viable/Control</u> |       | <u>Viable/HIC control</u> |       |
|                                                                                                            | FC                    | FDR  | FC                        | FDR  | FC                    | FDR   | FC                        | FDR   |
| <b>mmu-miR-3968</b>                                                                                        | -1.67                 | 0.17 | -1.62                     | 0.21 | -2.41                 | 0.00* | -2.29                     | 0.00* |
| <b>mmu-miR-3970</b>                                                                                        | -1.42                 | 0.39 | -1.35                     | 0.47 | -2.17                 | 0.02* | -2.32                     | 0.01* |
| <b>mmu-miR-423-3p</b>                                                                                      | -1.39                 | 0.17 | -1.47                     | 0.19 | -2.18                 | 0.00* | -2.05                     | 0.00* |
| <b>mmu-miR-423-5p</b>                                                                                      | -1.42                 | 0.26 | -1.42                     | 0.27 | -1.92                 | 0.01* | -1.94                     | 0.01* |
| <b>mmu-miR-425-5p</b>                                                                                      | -1.53                 | 0.21 | -1.79                     | 0.17 | -2.19                 | 0.01* | -2.37                     | 0.00* |
| <b>mmu-miR-429-3p</b>                                                                                      | -1.23                 | 0.54 | -1.38                     | 0.37 | -2.35                 | 0.02* | -2.20                     | 0.02* |
| <b>mmu-miR-433-5p</b>                                                                                      | 5.73                  | 0.11 | 4.74                      | 0.16 | 9.06                  | 0.00* | 8.26                      | 0.00* |
| <b>mmu-miR-451a</b>                                                                                        | -4.81                 | 0.16 | -5.58                     | 0.16 | -17.60                | 0.01* | -6.24                     | 0.01* |
| <b>mmu-miR-455-3p</b>                                                                                      | -3.00                 | 0.11 | -2.64                     | 0.16 | -4.79                 | 0.01* | -4.34                     | 0.00* |
| <b>mmu-miR-465b-5p</b>                                                                                     | 1.72                  | 0.17 | 1.85                      | 0.17 | 2.92                  | 0.00* | 2.77                      | 0.00* |
| <b>mmu-miR-465c-5p</b>                                                                                     | 1.36                  | 0.17 | 1.23                      | 0.31 | 1.23                  | 0.15  | 1.23                      | 0.08  |
| <b>mmu-miR-466a-3p/<br/>mmu-miR-466b-3p/<br/>mmu-miR-466c-3p/<br/>mmu-miR-466e-3p/<br/>mmu-miR-466p-3p</b> | -2.34                 | 0.16 | -1.96                     | 0.20 | -2.98                 | 0.00* | -3.02                     | 0.00* |
| <b>mmu-miR-466a-3p/<br/>mmu-miR-466e-3p</b>                                                                | -1.80                 | 0.15 | -1.71                     | 0.17 | -1.98                 | 0.00* | -1.92                     | 0.01* |
| <b>mmu-miR-466a-5p</b>                                                                                     | -1.65                 | 0.17 | -1.19                     | 0.56 | 1.01                  | 0.97  | -1.05                     | 0.71  |
| <b>mmu-miR-466a-5p/<br/>mmu-miR-466p-5p</b>                                                                | -1.52                 | 0.21 | -1.00                     | 1.00 | 1.35                  | 0.28  | 1.21                      | 0.24  |
| <b>mmu-miR-466b-5p/<br/>mmu-miR-466o-5p</b>                                                                | -1.80                 | 0.17 | -1.30                     | 0.46 | -1.01                 | 0.98  | -1.06                     | 0.71  |
| <b>mmu-miR-466c-5p</b>                                                                                     | -1.57                 | 0.17 | -1.05                     | 0.88 | 1.34                  | 0.23  | 1.26                      | 0.10  |
| <b>mmu-miR-466d-3p</b>                                                                                     | -2.37                 | 0.13 | -2.10                     | 0.17 | -3.05                 | 0.00* | -2.84                     | 0.00* |

|                                             | 24 hours              |      |                           |      | 48 hours              |       |                           |       |
|---------------------------------------------|-----------------------|------|---------------------------|------|-----------------------|-------|---------------------------|-------|
|                                             | <u>Viable/Control</u> |      | <u>Viable/HIC control</u> |      | <u>Viable/Control</u> |       | <u>Viable/HIC control</u> |       |
|                                             | FC                    | FDR  | FC                        | FDR  | FC                    | FDR   | FC                        | FDR   |
| <b>mmu-miR-466d-5p</b>                      | -1.50                 | 0.18 | 1.01                      | 0.99 | 1.55                  | 0.11  | 1.37                      | 0.04* |
| <b>mmu-miR-466e-5p</b>                      | -1.72                 | 0.17 | -1.34                     | 0.35 | -1.13                 | 0.54  | -1.11                     | 0.46  |
| <b>mmu-miR-466f</b>                         | -1.59                 | 0.17 | 1.01                      | 0.99 | 1.53                  | 0.18  | 1.33                      | 0.10  |
| <b>mmu-miR-466f-3p</b>                      | <b>-2.38</b>          | 0.17 | -1.71                     | 0.30 | <b>-2.40</b>          | 0.02* | <b>-2.37</b>              | 0.01* |
| <b>mmu-miR-466f-5p</b>                      | -1.80                 | 0.17 | -1.49                     | 0.27 | -1.39                 | 0.11  | -1.41                     | 0.03* |
| <b>mmu-miR-466i-3p</b>                      | <b>-2.52</b>          | 0.16 | <b>-2.04</b>              | 0.21 | <b>-3.09</b>          | 0.00* | <b>-3.07</b>              | 0.00* |
| <b>mmu-miR-466i-5p</b>                      | -1.24                 | 0.38 | 1.34                      | 0.42 | <b>2.23</b>           | 0.04* | 1.82                      | 0.01* |
| <b>mmu-miR-466j</b>                         | <b>-2.02</b>          | 0.16 | -1.68                     | 0.21 | -1.87                 | 0.01* | -1.75                     | 0.01* |
| <b>mmu-miR-466m-5p/<br/>mmu-miR-669m-5p</b> | <b>-2.14</b>          | 0.16 | -1.71                     | 0.22 | -1.78                 | 0.02* | -1.70                     | 0.01* |
| <b>mmu-miR-466n-5p</b>                      | -1.55                 | 0.17 | -1.16                     | 0.58 | 1.09                  | 0.67  | 1.06                      | 0.66  |
| <b>mmu-miR-466q</b>                         | <b>-2.31</b>          | 0.17 | -1.75                     | 0.26 | <b>-2.47</b>          | 0.01* | <b>-2.49</b>              | 0.00* |
| <b>mmu-miR-467a-3p</b>                      | <b>-2.25</b>          | 0.17 | -1.86                     | 0.24 | <b>-2.70</b>          | 0.00* | <b>-2.61</b>              | 0.00* |
| <b>mmu-miR-467c-3p</b>                      | -1.99                 | 0.16 | -1.69                     | 0.22 | <b>-2.26</b>          | 0.01* | <b>-2.31</b>              | 0.00* |
| <b>mmu-miR-467e-3p</b>                      | <b>-2.25</b>          | 0.17 | -1.75                     | 0.27 | <b>-2.29</b>          | 0.02* | <b>-2.33</b>              | 0.01* |
| <b>mmu-miR-467e-5p</b>                      | -1.58                 | 0.16 | -1.19                     | 0.50 | -1.12                 | 0.42  | -1.16                     | 0.21  |
| <b>mmu-miR-467f</b>                         | -1.86                 | 0.17 | -1.50                     | 0.31 | -1.62                 | 0.10  | -1.69                     | 0.02* |
| <b>mmu-miR-467g</b>                         | <b>-2.58</b>          | 0.16 | -1.91                     | 0.24 | <b>-2.69</b>          | 0.01* | <b>-2.70</b>              | 0.00* |
| <b>mmu-miR-467h</b>                         | <b>-2.06</b>          | 0.16 | -1.60                     | 0.23 | <b>-2.00</b>          | 0.01* | -1.96                     | 0.00* |
| <b>mmu-miR-468-3p</b>                       | -1.45                 | 0.19 | -1.12                     | 0.63 | 1.02                  | 0.93  | 1.05                      | 0.65  |



|                        | 24 hours              |      |                           |      | 48 hours              |       |                           |       |
|------------------------|-----------------------|------|---------------------------|------|-----------------------|-------|---------------------------|-------|
|                        | <u>Viable/Control</u> |      | <u>Viable/HIC control</u> |      | <u>Viable/Control</u> |       | <u>Viable/HIC control</u> |       |
|                        | FC                    | FDR  | FC                        | FDR  | FC                    | FDR   | FC                        | FDR   |
| <b>mmu-miR-470-5p</b>  | 1.01                  | 0.94 | -1.03                     | 0.84 | -1.06                 | 0.68  | -1.20                     | 0.21  |
| <b>mmu-miR-483-3p</b>  | -1.15                 | 0.46 | -1.28                     | 0.27 | -1.32                 | 0.06  | -1.32                     | 0.04* |
| <b>mmu-miR-484</b>     | -1.27                 | 0.33 | -1.40                     | 0.24 | -1.89                 | 0.01* | -1.75                     | 0.01* |
| <b>mmu-miR-485-3p</b>  | 1.18                  | 0.38 | 1.36                      | 0.22 | 1.58                  | 0.02* | 1.54                      | 0.01* |
| <b>mmu-miR-487b-3p</b> | -1.45                 | 0.29 | -1.67                     | 0.21 | <b>-2.45</b>          | 0.01* | <b>-2.62</b>              | 0.00* |
| <b>mmu-miR-487b-5p</b> | -1.04                 | 0.78 | 1.10                      | 0.59 | 1.19                  | 0.19  | 1.14                      | 0.20  |
| <b>mmu-miR-490-3p</b>  | 1.40                  | 0.16 | 1.55                      | 0.16 | 1.86                  | 0.01* | 1.79                      | 0.01* |
| <b>mmu-miR-490-5p</b>  | 1.66                  | 0.16 | 1.65                      | 0.17 | 1.44                  | 0.03* | 1.47                      | 0.03* |
| <b>mmu-miR-491-3p</b>  | <b>-5.26</b>          | 0.29 | <b>-5.54</b>              | 0.27 | <b>-6.28</b>          | 0.22  | <b>-9.34</b>              | 0.15  |
| <b>mmu-miR-491-5p</b>  | -1.06                 | 0.68 | 1.08                      | 0.64 | 1.14                  | 0.26  | 1.14                      | 0.26  |
| <b>mmu-miR-493-5p</b>  | 1.22                  | 0.39 | 1.04                      | 0.86 | -1.08                 | 0.56  | -1.08                     | 0.53  |
| <b>mmu-miR-495-5p</b>  | -1.23                 | 0.34 | -1.16                     | 0.48 | -1.26                 | 0.13  | -1.31                     | 0.08  |
| <b>mmu-miR-497-5p</b>  | <b>-2.26</b>          | 0.12 | <b>-2.28</b>              | 0.16 | <b>-3.97</b>          | 0.00* | <b>-3.53</b>              | 0.00* |
| <b>mmu-miR-500-3p</b>  | -1.53                 | 0.21 | -1.59                     | 0.21 | <b>-2.60</b>          | 0.00* | <b>-2.36</b>              | 0.00* |
| <b>mmu-miR-503-3p</b>  | -1.18                 | 0.43 | -1.11                     | 0.60 | -1.26                 | 0.23  | -1.04                     | 0.79  |
| <b>mmu-miR-503-5p</b>  | 1.11                  | 0.49 | 1.02                      | 0.90 | -1.01                 | 0.98  | 1.04                      | 0.78  |
| <b>mmu-miR-505-5p</b>  | -1.06                 | 0.69 | -1.09                     | 0.59 | -1.27                 | 0.11  | -1.25                     | 0.09  |
| <b>mmu-miR-5099</b>    | -1.75                 | 0.21 | -1.69                     | 0.24 | <b>-3.93</b>          | 0.00* | <b>-3.21</b>              | 0.00* |
| <b>mmu-miR-5100</b>    | 1.13                  | 0.71 | 1.38                      | 0.38 | -1.13                 | 0.44  | 1.10                      | 0.65  |

|                        | 24 hours              |      |                           |      | 48 hours              |       |                           |       |
|------------------------|-----------------------|------|---------------------------|------|-----------------------|-------|---------------------------|-------|
|                        | <u>Viable/Control</u> |      | <u>Viable/HIC control</u> |      | <u>Viable/Control</u> |       | <u>Viable/HIC control</u> |       |
|                        | FC                    | FDR  | FC                        | FDR  | FC                    | FDR   | FC                        | FDR   |
| <b>mmu-miR-5112</b>    | -1.12                 | 0.51 | -1.28                     | 0.30 | -1.51                 | 0.02* | -1.36                     | 0.02* |
| <b>mmu-miR-5113</b>    | 1.51                  | 0.21 | 2.10                      | 0.17 | 3.32                  | 0.01* | 2.84                      | 0.00* |
| <b>mmu-miR-5116</b>    | 1.68                  | 0.19 | 1.72                      | 0.20 | 2.62                  | 0.00* | 2.43                      | 0.00* |
| <b>mmu-miR-5119</b>    | -1.34                 | 0.25 | -1.54                     | 0.22 | -1.77                 | 0.01* | -1.68                     | 0.01* |
| <b>mmu-miR-5120</b>    | 5.83                  | 0.11 | 5.24                      | 0.16 | 9.41                  | 0.00* | 8.52                      | 0.00* |
| <b>mmu-miR-5121</b>    | -2.32                 | 0.11 | -2.63                     | 0.16 | -3.38                 | 0.01* | -2.43                     | 0.03* |
| <b>mmu-miR-5125</b>    | 1.22                  | 0.35 | 1.48                      | 0.17 | 2.11                  | 0.00* | 2.07                      | 0.00* |
| <b>mmu-miR-540-5p</b>  | -1.13                 | 0.46 | -1.31                     | 0.22 | -1.43                 | 0.05* | -1.51                     | 0.02* |
| <b>mmu-miR-541-3p</b>  | 1.08                  | 0.65 | -1.01                     | 0.97 | -1.22                 | 0.28  | -1.15                     | 0.29  |
| <b>mmu-miR-542-5p</b>  | 2.36                  | 0.12 | 2.05                      | 0.17 | 2.54                  | 0.01* | 2.42                      | 0.00* |
| <b>mmu-miR-551b-5p</b> | 5.64                  | 0.11 | 4.60                      | 0.16 | 7.67                  | 0.00* | 7.13                      | 0.00* |
| <b>mmu-miR-5616-5p</b> | -1.26                 | 0.27 | -1.00                     | 0.99 | 1.21                  | 0.26  | 1.15                      | 0.28  |
| <b>mmu-miR-5620-3p</b> | -1.03                 | 0.83 | 1.04                      | 0.80 | 1.09                  | 0.41  | 1.03                      | 0.80  |
| <b>mmu-miR-5621-5p</b> | 1.71                  | 0.25 | 1.87                      | 0.19 | 3.06                  | 0.00* | 2.70                      | 0.00* |
| <b>mmu-miR-5622-5p</b> | -1.66                 | 0.17 | -1.57                     | 0.21 | -2.10                 | 0.00* | -2.08                     | 0.00* |
| <b>mmu-miR-5624-5p</b> | 1.12                  | 0.54 | 1.59                      | 0.17 | 2.09                  | 0.00* | 2.03                      | 0.00* |
| <b>mmu-miR-5625-3p</b> | 1.58                  | 0.16 | 1.62                      | 0.17 | 1.63                  | 0.02* | 1.61                      | 0.01* |
| <b>mmu-miR-5626-5p</b> | 1.43                  | 0.24 | 1.38                      | 0.29 | 1.38                  | 0.07  | 1.29                      | 0.04* |
| <b>mmu-miR-574-3p</b>  | -1.80                 | 0.17 | -1.73                     | 0.19 | -2.59                 | 0.00* | -2.58                     | 0.00* |

|                                               | 24 hours              |       |                           |      | 48 hours              |       |                           |       |
|-----------------------------------------------|-----------------------|-------|---------------------------|------|-----------------------|-------|---------------------------|-------|
|                                               | <u>Viable/Control</u> |       | <u>Viable/HIC control</u> |      | <u>Viable/Control</u> |       | <u>Viable/HIC control</u> |       |
|                                               | FC                    | FDR   | FC                        | FDR  | FC                    | FDR   | FC                        | FDR   |
| <b>mmu-miR-574-5p</b>                         | -1.50                 | 0.18  | -1.17                     | 0.57 | 1.16                  | 0.45  | 1.14                      | 0.38  |
| <b>mmu-miR-592-3p</b>                         | <b>9.11</b>           | 0.02* | <b>0.00</b>               | 0.12 | <b>7.09</b>           | 0.01* | <b>5.58</b>               | 0.02* |
| <b>mmu-miR-615-3p</b>                         | 1.34                  | 0.25  | 1.38                      | 0.24 | 1.75                  | 0.00* | 1.76                      | 0.00* |
| <b>mmu-miR-652-3p</b>                         | -1.68                 | 0.38  | -1.92                     | 0.29 | <b>-4.14</b>          | 0.01* | <b>-4.24</b>              | 0.01* |
| <b>mmu-miR-653-3p</b>                         | 1.15                  | 0.53  | 1.32                      | 0.27 | 1.38                  | 0.02* | 1.22                      | 0.07  |
| <b>mmu-miR-664-3p</b>                         | 1.07                  | 0.69  | 1.08                      | 0.67 | -1.02                 | 0.85  | 1.00                      | 0.96  |
| <b>mmu-miR-664-5p</b>                         | 1.42                  | 0.16  | 1.50                      | 0.17 | 1.40                  | 0.04* | 1.38                      | 0.03* |
| <b>mmu-miR-665-3p</b>                         | 1.67                  | 0.12  | 1.58                      | 0.16 | 1.55                  | 0.01* | 1.50                      | 0.01* |
| <b>mmu-miR-665-5p</b>                         | <b>2.32</b>           | 0.11  | <b>2.96</b>               | 0.16 | <b>4.51</b>           | 0.00* | <b>3.87</b>               | 0.00* |
| <b>mmu-miR-667-3p</b>                         | -1.14                 | 0.56  | -1.08                     | 0.74 | -1.26                 | 0.26  | -1.31                     | 0.17  |
| <b>mmu-miR-668-3p</b>                         | -1.26                 | 0.32  | -1.61                     | 0.21 | -1.70                 | 0.08  | -1.27                     | 0.22  |
| <b>mmu-miR-668-5p</b>                         | 1.09                  | 0.56  | 1.13                      | 0.47 | 1.39                  | 0.08  | 1.46                      | 0.04* |
| <b>mmu-miR-669a-3-3p</b>                      | <b>-2.55</b>          | 0.16  | -1.92                     | 0.24 | <b>-2.74</b>          | 0.01* | <b>-2.73</b>              | 0.00* |
| <b>mmu-miR-669a-3p/<br/>mmu-miR-669o-3p</b>   | <b>-2.11</b>          | 0.17  | -1.67                     | 0.27 | <b>-2.16</b>          | 0.02* | <b>-2.23</b>              | 0.00* |
| <b>mmu-miR-669a-5p/<br/>mmu-miR-669p-5p</b>   | -1.83                 | 0.16  | -1.65                     | 0.21 | -1.97                 | 0.01* | -1.86                     | 0.01* |
| <b>mmu-miR-669b-3p</b>                        | <b>-3.15</b>          | 0.16  | <b>-2.37</b>              | 0.21 | <b>-4.27</b>          | 0.00* | <b>-3.92</b>              | 0.00* |
| <b>mmu-miR-669c-3p</b>                        | <b>-2.13</b>          | 0.17  | -1.62                     | 0.31 | <b>-2.04</b>          | 0.04* | <b>-2.07</b>              | 0.01* |
| <b>mmu-miR-669c-5p</b>                        | -1.14                 | 0.54  | 1.49                      | 0.27 | <b>2.23</b>           | 0.03* | 1.96                      | 0.01* |
| <b>mmu-miR-669d-2-3p/<br/>mmu-miR-669d-3p</b> | -1.62                 | 0.21  | -1.36                     | 0.37 | <b>-2.16</b>          | 0.01* | -1.95                     | 0.01* |

|                        | 24 hours              |      |                           |      | 48 hours              |       |                           |       |
|------------------------|-----------------------|------|---------------------------|------|-----------------------|-------|---------------------------|-------|
|                        | <u>Viable/Control</u> |      | <u>Viable/HIC control</u> |      | <u>Viable/Control</u> |       | <u>Viable/HIC control</u> |       |
|                        | FC                    | FDR  | FC                        | FDR  | FC                    | FDR   | FC                        | FDR   |
| <b>mmu-miR-669d-5p</b> | -1.73                 | 0.17 | -1.07                     | 0.84 | 1.27                  | 0.42  | 1.11                      | 0.52  |
| <b>mmu-miR-669e-3p</b> | -1.82                 | 0.16 | -1.59                     | 0.22 | <b>-2.16</b>          | 0.00* | <b>-2.11</b>              | 0.00* |
| <b>mmu-miR-669e-5p</b> | -1.76                 | 0.17 | -1.35                     | 0.33 | -1.16                 | 0.48  | -1.15                     | 0.37  |
| <b>mmu-miR-669f-3p</b> | <b>-2.59</b>          | 0.16 | -1.97                     | 0.24 | <b>-2.72</b>          | 0.01* | <b>-2.70</b>              | 0.00* |
| <b>mmu-miR-669f-5p</b> | -1.74                 | 0.17 | -1.11                     | 0.78 | 1.15                  | 0.61  | 1.06                      | 0.68  |
| <b>mmu-miR-669i</b>    | -2.00                 | 0.13 | -1.61                     | 0.21 | <b>-2.18</b>          | 0.01* | <b>-2.02</b>              | 0.01* |
| <b>mmu-miR-669k-5p</b> | -1.88                 | 0.17 | -1.24                     | 0.58 | -1.01                 | 0.98  | -1.08                     | 0.66  |
| <b>mmu-miR-669l-3p</b> | <b>-2.21</b>          | 0.17 | -1.85                     | 0.22 | <b>-2.93</b>          | 0.00* | <b>-2.72</b>              | 0.00* |
| <b>mmu-miR-669l-5p</b> | -1.78                 | 0.17 | -1.15                     | 0.69 | 1.06                  | 0.83  | -1.01                     | 0.95  |
| <b>mmu-miR-669m-3p</b> | <b>-2.61</b>          | 0.12 | <b>-2.09</b>              | 0.17 | <b>-3.44</b>          | 0.00* | <b>-2.92</b>              | 0.00* |
| <b>mmu-miR-669n</b>    | -1.10                 | 0.68 | 1.50                      | 0.27 | <b>2.28</b>           | 0.03* | <b>2.04</b>               | 0.01* |
| <b>mmu-miR-669o-5p</b> | -1.73                 | 0.17 | -1.27                     | 0.49 | 1.00                  | 0.99  | -1.06                     | 0.73  |
| <b>mmu-miR-669p-3p</b> | <b>-2.05</b>          | 0.17 | -1.48                     | 0.37 | -1.86                 | 0.07  | -1.91                     | 0.01* |
| <b>mmu-miR-673-3p</b>  | 1.03                  | 0.85 | -1.17                     | 0.35 | -1.25                 | 0.15  | -1.30                     | 0.09  |
| <b>mmu-miR-674-5p</b>  | -1.52                 | 0.24 | -1.65                     | 0.22 | <b>-2.22</b>          | 0.01* | <b>-2.31</b>              | 0.01* |
| <b>mmu-miR-675-5p</b>  | 1.39                  | 0.23 | 1.11                      | 0.68 | 1.04                  | 0.88  | -1.12                     | 0.61  |
| <b>mmu-miR-676-3p</b>  | -1.71                 | 0.16 | -1.75                     | 0.17 | <b>-2.63</b>          | 0.00* | <b>-2.38</b>              | 0.00* |
| <b>mmu-miR-677-3p</b>  | <b>8.84</b>           | 0.11 | <b>6.43</b>               | 0.16 | <b>15.98</b>          | 0.00* | <b>12.42</b>              | 0.00* |
| <b>mmu-miR-677-5p</b>  | -1.20                 | 0.46 | -1.37                     | 0.27 | -1.87                 | 0.01* | -1.78                     | 0.01* |

|                       | 24 hours              |      |                           |      | 48 hours              |       |                           |       |
|-----------------------|-----------------------|------|---------------------------|------|-----------------------|-------|---------------------------|-------|
|                       | <u>Viable/Control</u> |      | <u>Viable/HIC control</u> |      | <u>Viable/Control</u> |       | <u>Viable/HIC control</u> |       |
|                       | FC                    | FDR  | FC                        | FDR  | FC                    | FDR   | FC                        | FDR   |
| <b>mmu-miR-678</b>    | -1.10                 | 0.55 | -1.11                     | 0.56 | -1.16                 | 0.26  | -1.15                     | 0.18  |
| <b>mmu-miR-690</b>    | -1.02                 | 0.94 | 1.22                      | 0.49 | -1.28                 | 0.39  | 1.30                      | 0.18  |
| <b>mmu-miR-691</b>    | -1.86                 | 0.12 | -1.62                     | 0.17 | -1.52                 | 0.08  | -1.45                     | 0.15  |
| <b>mmu-miR-695</b>    | 1.02                  | 0.88 | -1.10                     | 0.59 | -1.22                 | 0.29  | -1.15                     | 0.39  |
| <b>mmu-miR-696</b>    | 1.13                  | 0.40 | 1.12                      | 0.48 | 1.16                  | 0.26  | 1.22                      | 0.09  |
| <b>mmu-miR-697</b>    | 1.36                  | 0.17 | 1.49                      | 0.17 | 1.73                  | 0.00* | 1.64                      | 0.01* |
| <b>mmu-miR-700-5p</b> | -1.22                 | 0.35 | -1.15                     | 0.51 | -1.34                 | 0.04* | -1.35                     | 0.03* |
| <b>mmu-miR-705</b>    | 1.98                  | 0.13 | 1.88                      | 0.16 | 2.90                  | 0.00* | 2.93                      | 0.00* |
| <b>mmu-miR-706</b>    | 1.32                  | 0.29 | 2.26                      | 0.17 | 3.94                  | 0.01* | 3.06                      | 0.00* |
| <b>mmu-miR-708-5p</b> | -1.18                 | 0.41 | -1.26                     | 0.31 | -1.51                 | 0.01* | -1.52                     | 0.01* |
| <b>mmu-miR-709</b>    | -2.35                 | 0.11 | -1.81                     | 0.16 | -1.90                 | 0.09  | -1.70                     | 0.14  |
| <b>mmu-miR-710</b>    | 3.71                  | 0.13 | 3.03                      | 0.17 | 5.35                  | 0.00* | 5.24                      | 0.00* |
| <b>mmu-miR-711</b>    | 4.66                  | 0.11 | 3.35                      | 0.16 | 5.45                  | 0.00* | 4.94                      | 0.00* |
| <b>mmu-miR-712-5p</b> | -1.19                 | 0.45 | -1.38                     | 0.24 | -1.63                 | 0.01* | -1.65                     | 0.02* |
| <b>mmu-miR-714</b>    | 1.68                  | 0.24 | 1.74                      | 0.23 | 2.21                  | 0.00* | 2.13                      | 0.00* |
| <b>mmu-miR-721</b>    | 1.23                  | 0.29 | 1.14                      | 0.50 | -1.03                 | 0.81  | 1.04                      | 0.74  |
| <b>mmu-miR-744-5p</b> | -1.50                 | 0.16 | -1.35                     | 0.22 | -2.31                 | 0.00* | -2.23                     | 0.00* |
| <b>mmu-miR-762</b>    | 1.24                  | 0.29 | 1.11                      | 0.59 | 1.24                  | 0.14  | 1.24                      | 0.14  |
| <b>mmu-miR-763</b>    | 1.87                  | 0.17 | 1.80                      | 0.21 | 2.02                  | 0.02* | 1.96                      | 0.02* |

|                         | 24 hours              |      |                           |      | 48 hours              |       |                           |       |
|-------------------------|-----------------------|------|---------------------------|------|-----------------------|-------|---------------------------|-------|
|                         | <u>Viable/Control</u> |      | <u>Viable/HIC control</u> |      | <u>Viable/Control</u> |       | <u>Viable/HIC control</u> |       |
|                         | FC                    | FDR  | FC                        | FDR  | FC                    | FDR   | FC                        | FDR   |
| <b>mmu-miR-767</b>      | -1.28                 | 0.24 | -1.63                     | 0.20 | -1.88                 | 0.03* | -1.66                     | 0.02* |
| <b>mmu-miR-7a-5p</b>    | -1.14                 | 0.55 | -1.36                     | 0.24 | -1.64                 | 0.01* | -1.67                     | 0.01* |
| <b>mmu-miR-7b-5p</b>    | -1.07                 | 0.68 | -1.20                     | 0.36 | -1.37                 | 0.04* | -1.30                     | 0.03* |
| <b>mmu-miR-872-3p</b>   | 1.36                  | 0.25 | 1.78                      | 0.16 | 2.38                  | 0.00* | 2.16                      | 0.00* |
| <b>mmu-miR-875-3p</b>   | 1.33                  | 0.24 | 1.29                      | 0.30 | 1.51                  | 0.06  | 1.31                      | 0.15  |
| <b>mmu-miR-877-5p</b>   | 1.02                  | 0.88 | -1.04                     | 0.80 | -1.15                 | 0.22  | -1.15                     | 0.16  |
| <b>mmu-miR-881-3p</b>   | -1.29                 | 0.25 | -1.08                     | 0.74 | 1.13                  | 0.44  | 1.03                      | 0.78  |
| <b>mmu-miR-882</b>      | 3.32                  | 0.11 | 2.98                      | 0.16 | 4.59                  | 0.00* | 4.39                      | 0.00* |
| <b>mmu-miR-883a-5p</b>  | -1.03                 | 0.86 | 1.26                      | 0.38 | 1.51                  | 0.07  | 1.44                      | 0.03* |
| <b>mmu-miR-883b-5p</b>  | -1.24                 | 0.29 | -1.31                     | 0.22 | -1.51                 | 0.02* | -1.49                     | 0.02* |
| <b>mmu-miR-9-5p</b>     | -1.16                 | 0.47 | -1.32                     | 0.27 | -1.64                 | 0.01* | -1.51                     | 0.02* |
| <b>mmu-miR-92a-2-5p</b> | 2.42                  | 0.12 | 2.00                      | 0.17 | 2.58                  | 0.00* | 2.55                      | 0.00* |
| <b>mmu-miR-92a-3p</b>   | -2.26                 | 0.21 | -2.79                     | 0.19 | -6.02                 | 0.00* | -5.49                     | 0.00* |
| <b>mmu-miR-92b-3p</b>   | 1.01                  | 0.95 | -1.11                     | 0.59 | -1.21                 | 0.23  | -1.23                     | 0.09  |
| <b>mmu-miR-93-5p</b>    | -1.95                 | 0.29 | -2.33                     | 0.22 | -4.72                 | 0.01* | -4.33                     | 0.01* |
| <b>mmu-miR-98-5p</b>    | -2.45                 | 0.19 | -2.29                     | 0.22 | -3.74                 | 0.02* | -4.07                     | 0.02  |
| <b>mmu-miR-99a-5p</b>   | -1.60                 | 0.29 | -1.72                     | 0.24 | -3.51                 | 0.01* | -3.30                     | 0.00* |
| <b>mmu-miR-99b-3p</b>   | -1.13                 | 0.47 | -1.13                     | 0.51 | -1.18                 | 0.18  | -1.21                     | 0.07  |
| <b>mmu-miR-99b-5p</b>   | -1.55                 | 0.36 | -1.64                     | 0.31 | -3.06                 | 0.01* | -3.23                     | 0.01* |

\*Red and blue values indicate up- and down-regulation, respectively. P-values  $\geq 0.05$  is considered significant.
