# Supplementary material
Source: PubMed Central journal article supplement (PMC5042847)
Supplement: NIHMS807316-supplement-Supp_Table_S2.pdf [file NIHMS807316-supplement-Supp_Table_S2.pdf]

Supplemental Table 2: All altered miRNAs

|                                          | 24 hours              |      |                           |      | 48 hours              |       |                           |       |
|------------------------------------------|-----------------------|------|---------------------------|------|-----------------------|-------|---------------------------|-------|
|                                          | <u>Viable/Control</u> |      | <u>Viable/HIC control</u> |      | <u>Viable/Control</u> |       | <u>Viable/HIC control</u> |       |
|                                          | FC                    | FDR  | FC                        | FDR  | FC                    | FDR   | FC                        | FDR   |
| <b>mmu-let-7a-5p</b>                     | -3.45                 | 0.2  | -3.09                     | 0.24 | -4.80                 | 0.03* | -5.80                     | 0.02* |
| <b>mmu-let-7b-5p</b>                     | -2.35                 | 0.17 | -2.15                     | 0.21 | -3.76                 | 0.04* | -4.24                     | 0.03* |
| <b>mmu-let-7c-5p</b>                     | -2.75                 | 0.21 | -2.58                     | 0.23 | -4.26                 | 0.04* | -5.16                     | 0.03* |
| <b>mmu-let-7d-5p</b>                     | -2.89                 | 0.12 | -2.41                     | 0.17 | -5.12                 | 0.00* | -5.69                     | 0.00* |
| <b>mmu-let-7f-5p</b>                     | -2.45                 | 0.19 | -2.37                     | 0.22 | -4.93                 | 0.01* | -4.6                      | 0.01* |
| <b>mmu-let-7g-5p</b>                     | -3.94                 | 0.17 | -3.21                     | 0.21 | -7.27                 | 0.00* | -7.15                     | 0.00* |
| <b>mmu-let-7i-5p</b>                     | -1.46                 | 0.32 | -1.39                     | 0.39 | -2.2                  | 0.03* | -2.38                     | 0.02* |
| <b>mmu-miR-100-5p</b>                    | -1.54                 | 0.26 | -1.67                     | 0.22 | -3                    | 0.00* | -2.87                     | 0.00* |
| <b>mmu-miR-101a-3p</b>                   | -1.83                 | 0.25 | -1.95                     | 0.23 | -3.6                  | 0.02* | -3.37                     | 0.03* |
| <b>mmu-miR-101a-3p/<br/>mmu-miR-101c</b> | -2.01                 | 0.17 | -2.08                     | 0.2  | -3.63                 | 0.01* | -3.22                     | 0.01* |
| <b>mmu-miR-101b-3p</b>                   | -1.38                 | 0.27 | -1.52                     | 0.22 | -2.21                 | 0.02* | -2.19                     | 0.01* |
| <b>mmu-miR-103-3p</b>                    | -2.55                 | 0.17 | -2.81                     | 0.17 | -5.98                 | 0.01* | -6.03                     | 0.01* |
| <b>mmu-miR-106a-5p</b>                   | -1.87                 | 0.16 | -2.06                     | 0.16 | -3.34                 | 0.00* | -2.99                     | 0.00* |
| <b>mmu-miR-106b-5p</b>                   | -4.56                 | 0.17 | -4.69                     | 0.19 | -12.51                | 0.00* | -12.14                    | 0.00* |
| <b>mmu-miR-107-3p</b>                    | -1.89                 | 0.17 | -2.27                     | 0.16 | -4.1                  | 0.00* | -4.00                     | 0.00* |
| <b>mmu-miR-10a-5p</b>                    | -1.91                 | 0.26 | -1.95                     | 0.25 | -4.42                 | 0.01* | -3.68                     | 0.01* |
| <b>mmu-miR-10b-5p</b>                    | -1.53                 | 0.27 | -1.83                     | 0.19 | -2.89                 | 0.00* | -2.51                     | 0.00* |
| <b>mmu-miR-1192</b>                      | -1.95                 | 0.17 | -1.58                     | 0.29 | -2.12                 | 0.03* | -2.12                     | 0.02* |

|                                          | 24 hours              |      |                           |      | 48 hours              |       |                           |       |
|------------------------------------------|-----------------------|------|---------------------------|------|-----------------------|-------|---------------------------|-------|
|                                          | <u>Viable/Control</u> |      | <u>Viable/HIC control</u> |      | <u>Viable/Control</u> |       | <u>Viable/HIC control</u> |       |
|                                          | FC                    | FDR  | FC                        | FDR  | FC                    | FDR   | FC                        | FDR   |
| <b>mmu-miR-125a-5p</b>                   | -2.07                 | 0.22 | -2.03                     | 0.24 | -4.46                 | 0.02* | -4.45                     | 0.02* |
| <b>mmu-miR-125b-5p</b>                   | -2.12                 | 0.23 | -2.15                     | 0.23 | -5.33                 | 0.03* | -5.47                     | 0.03* |
| <b>mmu-miR-126a-3p</b>                   | -2.98                 | 0.25 | -2.98                     | 0.25 | -6.55                 | 0.01* | -5.76                     | 0.02* |
| <b>mmu-miR-126a-5p</b>                   | -2.27                 | 0.2  | -2.28                     | 0.22 | -4.39                 | 0.01* | -4.07                     | 0.01* |
| <b>mmu-miR-130a-3p</b>                   | -3.94                 | 0.11 | -3.64                     | 0.16 | -10.05                | 0.00* | -7.74                     | 0.00* |
| <b>mmu-miR-133a-3p</b>                   | -3.52                 | 0.16 | -4.53                     | 0.16 | -7.08                 | 0.00* | -6.16                     | 0.00* |
| <b>mmu-miR-133b-3p</b>                   | -3.88                 | 0.16 | -4.7                      | 0.16 | -7.78                 | 0.00* | -6.68                     | 0.00* |
| <b>mmu-miR-140-3p</b>                    | -3.55                 | 0.16 | -3.61                     | 0.17 | -8.85                 | 0.00* | -8.1                      | 0.00* |
| <b>mmu-miR-140-5p</b>                    | -1.42                 | 0.29 | -1.56                     | 0.23 | -2.13                 | 0.02* | -2.1                      | 0.02* |
| <b>mmu-miR-141-3p</b>                    | -1.26                 | 0.41 | -1.50                     | 0.23 | -2.47                 | 0.03* | -2.45                     | 0.02* |
| <b>mmu-miR-142-3p</b>                    | -1.46                 | 0.46 | -1.66                     | 0.32 | -2.41                 | 0.11  | -2.65                     | 0.11  |
| <b>mmu-miR-142-5p</b>                    | -1.65                 | 0.21 | -1.94                     | 0.17 | -2.68                 | 0.01* | -2.67                     | 0.01* |
| <b>mmu-miR-143-3p</b>                    | -2.92                 | 0.25 | -2.91                     | 0.26 | -8.49                 | 0.05* | -8.32                     | 0.05* |
| <b>mmu-miR-144-3p</b>                    | -1.66                 | 0.2  | -2.01                     | 0.17 | -3.37                 | 0.02* | -2.23                     | 0.03* |
| <b>mmu-miR-145a-5p/<br/>mmu-miR-145b</b> | -4.78                 | 0.17 | -4.23                     | 0.21 | -12.95                | 0.01* | -12.24                    | 0.01* |
| <b>mmu-miR-146a-5p</b>                   | -2.44                 | 0.25 | -2.77                     | 0.22 | -5.62                 | 0.01* | -5.74                     | 0.01* |
| <b>mmu-miR-146b-5p</b>                   | -1.67                 | 0.43 | -1.94                     | 0.32 | -3.61                 | 0.03* | -3.86                     | 0.02* |
| <b>mmu-miR-148b-3p</b>                   | -1.74                 | 0.17 | -2.08                     | 0.16 | -2.96                 | 0.00* | -2.75                     | 0.00* |
| <b>mmu-miR-151-3p</b>                    | -1.38                 | 0.29 | -1.57                     | 0.22 | -2.3                  | 0.01* | -2.29                     | 0.01* |

|                         | 24 hours              |      |                           |      | 48 hours              |       |                           |       |
|-------------------------|-----------------------|------|---------------------------|------|-----------------------|-------|---------------------------|-------|
|                         | <u>Viable/Control</u> |      | <u>Viable/HIC control</u> |      | <u>Viable/Control</u> |       | <u>Viable/HIC control</u> |       |
|                         | FC                    | FDR  | FC                        | FDR  | FC                    | FDR   | FC                        | FDR   |
| <b>mmu-miR-151-5p</b>   | -3.53                 | 0.11 | -2.93                     | 0.16 | -7.77                 | 0.00* | -6.36                     | 0.00* |
| <b>mmu-miR-152-3p</b>   | -2.12                 | 0.11 | -2.06                     | 0.16 | -3.47                 | 0.00* | -3.28                     | 0.00* |
| <b>mmu-miR-155-5p</b>   | -1.38                 | 0.4  | -1.81                     | 0.21 | -2.33                 | 0.01* | -2.35                     | 0.01* |
| <b>mmu-miR-15a-5p</b>   | -2.88                 | 0.16 | -3.14                     | 0.17 | -6.23                 | 0.00* | -5.69                     | 0.00* |
| <b>mmu-miR-15b-5p</b>   | -4.86                 | 0.11 | -5.5                      | 0.16 | -10.38                | 0.00* | -8.61                     | 0.00* |
| <b>mmu-miR-16-5p</b>    | -5.28                 | 0.16 | -4.71                     | 0.17 | -18.29                | 0.00* | -14.82                    | 0.00* |
| <b>mmu-miR-17-5p</b>    | -2.09                 | 0.17 | -2.29                     | 0.17 | -4.69                 | 0.00* | -4.17                     | 0.00* |
| <b>mmu-miR-181a-5p</b>  | -2.98                 | 0.18 | -3.28                     | 0.19 | -7.15                 | 0.02* | -6.93                     | 0.02* |
| <b>mmu-miR-181b-5p</b>  | -2.05                 | 0.17 | -2.18                     | 0.17 | -4.01                 | 0.00* | -3.88                     | 0.00* |
| <b>mmu-miR-181d-5p</b>  | -2.01                 | 0.12 | -1.92                     | 0.16 | -2.98                 | 0.00* | -2.74                     | 0.00* |
| <b>mmu-miR-183-3p</b>   | 3.86                  | 0.16 | 3.22                      | 0.17 | 4.65                  | 0.00* | 4.43                      | 0.00* |
| <b>mmu-miR-1839-3p</b>  | -1.45                 | 0.2  | -1.45                     | 0.21 | -2.17                 | 0.00* | -2                        | 0.00* |
| <b>mmu-miR-184-5p</b>   | -1.37                 | 0.39 | -1.34                     | 0.42 | -2.2                  | 0.07  | -2.14                     | 0.08  |
| <b>mmu-miR-1843a-5p</b> | -2.34                 | 0.12 | -2.19                     | 0.16 | -4.4                  | 0.00* | -3.68                     | 0.00* |
| <b>mmu-miR-1843b-3p</b> | 6.4                   | 0.11 | 6.23                      | 0.16 | 13.3                  | 0.00* | 10.64                     | 0.00* |
| <b>mmu-miR-1843b-5p</b> | -2.18                 | 0.12 | -2.08                     | 0.16 | -3.54                 | 0.00* | -2.97                     | 0.00* |
| <b>mmu-miR-185-5p</b>   | -1.61                 | 0.17 | -1.72                     | 0.17 | -2.69                 | 0.00* | -2.64                     | 0.00* |
| <b>mmu-miR-187-3p</b>   | -1.51                 | 0.17 | -1.59                     | 0.19 | -2.10                 | 0.00* | -2.22                     | 0.00* |
| <b>mmu-miR-1894-3p</b>  | 2.77                  | 0.12 | 2.28                      | 0.17 | 2.72                  | 0.00* | 2.76                      | 0.00* |

|                                             | 24 hours              |      |                           |      | 48 hours              |       |                           |       |
|---------------------------------------------|-----------------------|------|---------------------------|------|-----------------------|-------|---------------------------|-------|
|                                             | <u>Viable/Control</u> |      | <u>Viable/HIC control</u> |      | <u>Viable/Control</u> |       | <u>Viable/HIC control</u> |       |
|                                             | FC                    | FDR  | FC                        | FDR  | FC                    | FDR   | FC                        | FDR   |
| <b>mmu-miR-1897-5p</b>                      | 1.49                  | 0.24 | <b>2.08</b>               | 0.17 | <b>3.47</b>           | 0.01* | <b>2.97</b>               | 0.00* |
| <b>mmu-miR-191-5p</b>                       | <b>-4.66</b>          | 0.13 | <b>-4.55</b>              | 0.16 | <b>-11.14</b>         | 0.00* | <b>-10.62</b>             | 0.00* |
| <b>mmu-miR-1929-5p</b>                      | -1.75                 | 0.17 | -1.45                     | 0.3  | <b>-2.04</b>          | 0.01* | -1.91                     | 0.01* |
| <b>mmu-miR-193a-3p</b>                      | -1.82                 | 0.17 | <b>-2.14</b>              | 0.17 | <b>-3.19</b>          | 0.00* | <b>-3.04</b>              | 0.00* |
| <b>mmu-miR-1941-3p</b>                      | <b>2.29</b>           | 0.11 | <b>2.17</b>               | 0.16 | <b>3.21</b>           | 0.01* | <b>3.02</b>               | 0.01* |
| <b>mmu-miR-1947-3p</b>                      | <b>6.44</b>           | 0.11 | <b>5.91</b>               | 0.16 | <b>13.52</b>          | 0.01* | <b>11.39</b>              | 0.01* |
| <b>mmu-miR-1949</b>                         | -1.62                 | 0.26 | -1.72                     | 0.22 | <b>-2.86</b>          | 0.00* | <b>-2.51</b>              | 0.00* |
| <b>mmu-miR-195a-5p</b>                      | <b>-5.66</b>          | 0.11 | <b>-5.35</b>              | 0.16 | <b>-13.79</b>         | 0.00* | <b>-10.99</b>             | 0.00* |
| <b>mmu-miR-1961</b>                         | -1.47                 | 0.2  | -1.48                     | 0.21 | <b>-2.09</b>          | 0.01* | <b>-2.12</b>              | 0.00* |
| <b>mmu-miR-1981-3p</b>                      | <b>2.99</b>           | 0.11 | <b>2.97</b>               | 0.16 | <b>4.48</b>           | 0.00* | <b>3.94</b>               | 0.00* |
| <b>mmu-miR-199a-3p/<br/>mmu-miR-199b-3p</b> | <b>-3.95</b>          | 0.12 | <b>-3.86</b>              | 0.16 | <b>-9.72</b>          | 0.00* | <b>-8.7</b>               | 0.00* |
| <b>mmu-miR-199a-5p</b>                      | <b>-2.84</b>          | 0.17 | <b>-3.54</b>              | 0.17 | <b>-7.35</b>          | 0.00* | <b>-7.97</b>              | 0.00* |
| <b>mmu-miR-199b-5p</b>                      | -1.67                 | 0.22 | <b>-2.27</b>              | 0.17 | <b>-3.45</b>          | 0.01* | <b>-3.48</b>              | 0.00* |
| <b>mmu-miR-19b-3p</b>                       | -1.42                 | 0.2  | -1.51                     | 0.2  | <b>-2.12</b>          | 0.01* | <b>-2.14</b>              | 0.01* |
| <b>mmu-miR-1a-3p</b>                        | -1.97                 | 0.17 | -1.99                     | 0.17 | <b>-3.07</b>          | 0.01* | <b>-2.47</b>              | 0.00* |
| <b>mmu-miR-200a-3p</b>                      | <b>-2.15</b>          | 0.27 | <b>-2.31</b>              | 0.25 | <b>-5.78</b>          | 0.01* | <b>-5.59</b>              | 0.01* |
| <b>mmu-miR-200b-3p</b>                      | -1.41                 | 0.35 | -1.34                     | 0.41 | <b>-2.2</b>           | 0.01* | -1.94                     | 0.02* |
| <b>mmu-miR-200c-3p</b>                      | -1.81                 | 0.17 | -1.58                     | 0.23 | <b>-3.51</b>          | 0.01* | <b>-2.75</b>              | 0.01* |
| <b>mmu-miR-205-5p</b>                       | -1.29                 | 0.4  | -1.70                     | 0.21 | <b>-3.27</b>          | 0.01* | <b>-2.51</b>              | 0.00* |

|                        | 24 hours              |      |                           |      | 48 hours              |       |                           |       |
|------------------------|-----------------------|------|---------------------------|------|-----------------------|-------|---------------------------|-------|
|                        | <u>Viable/Control</u> |      | <u>Viable/HIC control</u> |      | <u>Viable/Control</u> |       | <u>Viable/HIC control</u> |       |
|                        | FC                    | FDR  | FC                        | FDR  | FC                    | FDR   | FC                        | FDR   |
| <b>mmu-miR-20a-5p</b>  | -1.87                 | 0.24 | -2.30                     | 0.19 | -4.20                 | 0.00* | -3.77                     | 0.00* |
| <b>mmu-miR-20b-5p</b>  | -1.49                 | 0.25 | -1.8                      | 0.19 | -2.31                 | 0.01* | -2.29                     | 0.01* |
| <b>mmu-miR-210-3p</b>  | -1.37                 | 0.34 | -1.43                     | 0.29 | -2.21                 | 0.01* | -2.12                     | 0.01* |
| <b>mmu-miR-2137</b>    | 10.23                 | 0.11 | 7.11                      | 0.16 | 15.35                 | 0.00* | 13.14                     | 0.00* |
| <b>mmu-miR-214-3p</b>  | -4.71                 | 0.11 | -4.03                     | 0.16 | -10.33                | 0.00* | -9.49                     | 0.00* |
| <b>mmu-miR-21a-5p</b>  | -1.77                 | 0.52 | -2.04                     | 0.43 | -4.64                 | 0.04* | -4.82                     | 0.05* |
| <b>mmu-miR-22-3p</b>   | -1.37                 | 0.4  | -1.49                     | 0.31 | -4.46                 | 0.04* | -4.28                     | 0.04* |
| <b>mmu-miR-22-5p</b>   | -1.93                 | 0.17 | -2.08                     | 0.17 | -3.48                 | 0.00* | -3.44                     | 0.00* |
| <b>mmu-miR-221-3p</b>  | -2.01                 | 0.19 | -2.2                      | 0.19 | -4.36                 | 0.00* | -4.25                     | 0.00* |
| <b>mmu-miR-222-3p</b>  | -1.40                 | 0.29 | -1.49                     | 0.27 | -2.39                 | 0.02* | -2.30                     | 0.01* |
| <b>mmu-miR-223-3p</b>  | -1.96                 | 0.16 | -2.27                     | 0.16 | -3.75                 | 0.00* | -3.35                     | 0.00* |
| <b>mmu-miR-23a-3p</b>  | -6.95                 | 0.11 | -5.43                     | 0.16 | -25.3                 | 0.01* | -21.05                    | 0.01* |
| <b>mmu-miR-23b-3p</b>  | -16.47                | 0.11 | -12.08                    | 0.16 | -62.23                | 0.00* | -52.84                    | 0.00* |
| <b>mmu-miR-24-2-5p</b> | -1.64                 | 0.13 | -1.64                     | 0.16 | -2.5                  | 0.00* | -2.35                     | 0.00* |
| <b>mmu-miR-24-3p</b>   | -10.44                | 0.12 | -9.51                     | 0.16 | -34.34                | 0.00* | -32.66                    | 0.00* |
| <b>mmu-miR-25-3p</b>   | -2.28                 | 0.17 | -2.63                     | 0.17 | -5.58                 | 0.00* | -4.79                     | 0.00* |
| <b>mmu-miR-25-5p</b>   | -1.58                 | 0.16 | -1.06                     | 0.88 | -2.44                 | 0.07  | -2.11                     | 0.12  |
| <b>mmu-miR-26a-5p</b>  | -2.95                 | 0.19 | -3.00                     | 0.21 | -8.49                 | 0.02* | -7.81                     | 0.02* |
| <b>mmu-miR-26b-5p</b>  | -5.44                 | 0.16 | -4.71                     | 0.17 | -14.11                | 0.00* | -12.42                    | 0.00* |

|                                                                  | 24 hours              |      |                           |      | 48 hours              |       |                           |       |
|------------------------------------------------------------------|-----------------------|------|---------------------------|------|-----------------------|-------|---------------------------|-------|
|                                                                  | <u>Viable/Control</u> |      | <u>Viable/HIC control</u> |      | <u>Viable/Control</u> |       | <u>Viable/HIC control</u> |       |
|                                                                  | FC                    | FDR  | FC                        | FDR  | FC                    | FDR   | FC                        | FDR   |
| <b>mmu-miR-27a-3p</b>                                            | -4.54                 | 0.17 | -5.71                     | 0.17 | -11.96                | 0.00* | -14.07                    | 0.00* |
| <b>mmu-miR-27b-3p</b>                                            | -3.89                 | 0.18 | -4.8                      | 0.17 | -9.78                 | 0.01* | -10.65                    | 0.00* |
| <b>mmu-miR-28a-5p/<br/>mmu-miR-28c</b>                           | -4.96                 | 0.12 | -3.88                     | 0.16 | -11.96                | 0.00* | -9.30                     | 0.00* |
| <b>mmu-miR-290a-3p</b>                                           | 2.80                  | 0.12 | 2.60                      | 0.16 | 4.39                  | 0.00* | 4.03                      | 0.00* |
| <b>mmu-miR-291a-5p</b>                                           | 1.98                  | 0.17 | 1.77                      | 0.22 | 2.35                  | 0.00* | 2.12                      | 0.00* |
| <b>mmu-miR-291b-5p</b>                                           | 1.88                  | 0.19 | 1.72                      | 0.24 | 2.29                  | 0.00* | 2.11                      | 0.00* |
| <b>mmu-miR-294-5p</b>                                            | 1.90                  | 0.17 | 1.91                      | 0.17 | 2.82                  | 0.00* | 2.53                      | 0.00* |
| <b>mmu-miR-297a-3p/<br/>mmu-miR-297b-3p/<br/>mmu-miR-297c-3p</b> | -2.42                 | 0.16 | -1.97                     | 0.21 | -3.06                 | 0.00* | -3.07                     | 0.00* |
| <b>mmu-miR-299a-5p</b>                                           | 1.85                  | 0.13 | 1.94                      | 0.16 | 3.18                  | 0.00* | 2.89                      | 0.00* |
| <b>mmu-miR-29a-3p</b>                                            | -5.35                 | 0.23 | -6.6                      | 0.21 | -20.97                | 0.01* | -22.03                    | 0.01* |
| <b>mmu-miR-29b-3p</b>                                            | -2.43                 | 0.16 | -2.58                     | 0.17 | -6.35                 | 0.00* | -5.55                     | 0.00* |
| <b>mmu-miR-29c-3p</b>                                            | -2.44                 | 0.19 | -2.87                     | 0.19 | -6.49                 | 0.00* | -5.73                     | 0.00* |
| <b>mmu-miR-302a-3p</b>                                           | 2.7                   | 0.11 | 2.52                      | 0.16 | 4.05                  | 0.00* | 3.49                      | 0.01* |
| <b>mmu-miR-3068-3p</b>                                           | -2.00                 | 0.25 | -2.17                     | 0.24 | -3.08                 | 0.02* | -2.4                      | 0.04* |
| <b>mmu-miR-3069-3p</b>                                           | -2.67                 | 0.16 | -2.45                     | 0.17 | -4.18                 | 0.00* | -3.88                     | 0.00* |
| <b>mmu-miR-3081-5p</b>                                           | 2.04                  | 0.17 | 1.79                      | 0.23 | 2.65                  | 0.00* | 2.65                      | 0.00* |
| <b>mmu-miR-3084-3p</b>                                           | -1.42                 | 0.46 | -1.27                     | 0.6  | -2.76                 | 0.04* | -2.01                     | 0.11  |
| <b>mmu-miR-3084-5p</b>                                           | -1.78                 | 0.17 | -1.75                     | 0.17 | -2.83                 | 0.00* | -2.09                     | 0.01* |
| <b>mmu-miR-3098-3p</b>                                           | 1.54                  | 0.17 | 1.85                      | 0.17 | 3.11                  | 0.00* | 2.79                      | 0.00* |

|                        | 24 hours              |      |                           |      | 48 hours              |       |                           |       |
|------------------------|-----------------------|------|---------------------------|------|-----------------------|-------|---------------------------|-------|
|                        | <u>Viable/Control</u> |      | <u>Viable/HIC control</u> |      | <u>Viable/Control</u> |       | <u>Viable/HIC control</u> |       |
|                        | FC                    | FDR  | FC                        | FDR  | FC                    | FDR   | FC                        | FDR   |
| <b>mmu-miR-30a-3p</b>  | -2.82                 | 0.11 | -2.62                     | 0.16 | -4.60                 | 0.00* | -4.40                     | 0.00* |
| <b>mmu-miR-30a-5p</b>  | -2.74                 | 0.19 | -3.03                     | 0.2  | -7.02                 | 0.00* | -6.46                     | 0.00* |
| <b>mmu-miR-30b-5p</b>  | -7.65                 | 0.11 | -6.83                     | 0.16 | -19.7                 | 0.00* | -17.62                    | 0.00* |
| <b>mmu-miR-30c-5p</b>  | -10.58                | 0.11 | -9.06                     | 0.16 | -24.9                 | 0.00* | -21.05                    | 0.00* |
| <b>mmu-miR-30d-5p</b>  | -2.98                 | 0.17 | -3.24                     | 0.17 | -7.08                 | 0.01* | -6.96                     | 0.00* |
| <b>mmu-miR-30e-3p</b>  | -3.28                 | 0.11 | -3.32                     | 0.16 | -6.67                 | 0.00* | -5.53                     | 0.00* |
| <b>mmu-miR-30e-5p</b>  | -2.22                 | 0.23 | -2.66                     | 0.21 | -5.41                 | 0.01* | -5.19                     | 0.01* |
| <b>mmu-miR-3100-3p</b> | 1.87                  | 0.19 | 1.96                      | 0.17 | 2.89                  | 0.00* | 2.61                      | 0.00* |
| <b>mmu-miR-3103-3p</b> | 4.07                  | 0.12 | 4.12                      | 0.16 | 12.69                 | 0.00* | 10.22                     | 0.00* |
| <b>mmu-miR-3109-5p</b> | 2.12                  | 0.16 | 2.00                      | 0.17 | 3.09                  | 0.00* | 2.89                      | 0.00* |
| <b>mmu-miR-320-3p</b>  | -1.53                 | 0.29 | -1.7                      | 0.23 | -2.53                 | 0.01* | -2.48                     | 0.01* |
| <b>mmu-miR-322-5p</b>  | -2.03                 | 0.12 | -2.01                     | 0.16 | -3.22                 | 0.00* | -2.85                     | 0.00* |
| <b>mmu-miR-326-3p</b>  | -1.93                 | 0.17 | -2.24                     | 0.17 | -3.66                 | 0.01* | -3.72                     | 0.00* |
| <b>mmu-miR-338-3p</b>  | -1.67                 | 0.17 | -2.02                     | 0.16 | -2.88                 | 0.00* | -2.54                     | 0.00* |
| <b>mmu-miR-339-5p</b>  | -1.35                 | 0.42 | -1.79                     | 0.22 | -2.9                  | 0.01* | -3.15                     | 0.01* |
| <b>mmu-miR-3473b</b>   | 3.21                  | 0.16 | 3.36                      | 0.16 | 4.27                  | 0.00* | 4.31                      | 0.00* |
| <b>mmu-miR-3474</b>    | 1.69                  | 0.21 | 1.6                       | 0.23 | 4.17                  | 0.00* | 3.11                      | 0.01* |
| <b>mmu-miR-34a-5p</b>  | -1.68                 | 0.37 | -1.89                     | 0.3  | -4.37                 | 0.02* | -4.69                     | 0.01* |
| <b>mmu-miR-34b-3p</b>  | -1.92                 | 0.16 | -1.85                     | 0.18 | -3.22                 | 0.00* | -2.87                     | 0.00* |

|                                                            | 24 hours              |      |                           |      | 48 hours              |       |                           |       |
|------------------------------------------------------------|-----------------------|------|---------------------------|------|-----------------------|-------|---------------------------|-------|
|                                                            | <u>Viable/Control</u> |      | <u>Viable/HIC control</u> |      | <u>Viable/Control</u> |       | <u>Viable/HIC control</u> |       |
|                                                            | FC                    | FDR  | FC                        | FDR  | FC                    | FDR   | FC                        | FDR   |
| <b>mmu-miR-34b-5p</b>                                      | -1.77                 | 0.44 | -2.1                      | 0.33 | -5.47                 | 0.02* | -5.94                     | 0.02* |
| <b>mmu-miR-34c-3p</b>                                      | -2.41                 | 0.11 | -2.02                     | 0.16 | -3.4                  | 0.00* | -3.1                      | 0.00* |
| <b>mmu-miR-34c-5p</b>                                      | -1.99                 | 0.36 | -2.25                     | 0.3  | -5.46                 | 0.02* | -5.77                     | 0.02* |
| <b>mmu-miR-351-5p</b>                                      | -3.57                 | 0.11 | 2.8                       | 0.16 | 4.59                  | 0.00* | 4.38                      | 0.00* |
| <b>mmu-miR-3544-3p</b>                                     | 5.37                  | 0.11 | 4.00                      | 0.16 | 6.6                   | 0.00* | 5.93                      | 0.00* |
| <b>mmu-miR-3572-3p</b>                                     | 1.52                  | 0.29 | 2.1                       | 0.23 | 4.58                  | 0.00* | 2.72                      | 0.00* |
| <b>mmu-miR-361-5p</b>                                      | -1.76                 | 0.21 | -2.08                     | 0.17 | -3.65                 | 0.00* | -3.16                     | 0.00* |
| <b>mmu-miR-365-3p</b>                                      | -1.74                 | 0.19 | -2.08                     | 0.17 | -3.49                 | 0.00* | -3.34                     | 0.00* |
| <b>mmu-miR-374b-5p</b>                                     | -1.41                 | 0.21 | -1.3                      | 0.31 | -2.1                  | 0.00* | -1.85                     | 0.00* |
| <b>mmu-miR-375-3p</b>                                      | -1.63                 | 0.24 | -1.65                     | 0.24 | -2.65                 | 0.01* | -2.54                     | 0.01* |
| <b>mmu-miR-378a-3p</b>                                     | -1.14                 | 0.71 | -1.44                     | 0.31 | -2.27                 | 0.08  | -2.27                     | 0.07  |
| <b>mmu-miR-378a-3p/<br/>mmu-miR-378b/<br/>mmu-miR-378c</b> | -1.37                 | 0.49 | -1.78                     | 0.22 | -2.98                 | 0.03* | -3.12                     | 0.02* |
| <b>mmu-miR-378b</b>                                        | -1.29                 | 0.53 | -1.57                     | 0.25 | -2.28                 | 0.04* | -2.21                     | 0.03* |
| <b>mmu-miR-381-5p</b>                                      | 2.30                  | 0.11 | 1.90                      | 0.16 | 2.61                  | 0.00* | 2.93                      | 0.00* |
| <b>mmu-miR-3961</b>                                        | -1.54                 | 0.38 | -1.49                     | 0.4  | -1.88                 | 0.11  | -2.13                     | 0.06  |
| <b>mmu-miR-3962</b>                                        | -3.71                 | 0.16 | -3.09                     | 0.19 | -7.1                  | 0.00* | -6.79                     | 0.00* |
| <b>mmu-miR-3963</b>                                        | -1.36                 | 0.17 | -1.54                     | 0.21 | -2.83                 | 0.00* | -2.86                     | 0.00* |
| <b>mmu-miR-3968</b>                                        | -1.67                 | 0.17 | -1.62                     | 0.21 | -2.41                 | 0.00* | -2.29                     | 0.00* |
| <b>mmu-miR-3970</b>                                        | -1.42                 | 0.39 | -1.35                     | 0.47 | -2.17                 | 0.02* | -2.32                     | 0.01* |



|                                                                                                            | 24 hours              |      |                           |      | 48 hours              |       |                           |       |
|------------------------------------------------------------------------------------------------------------|-----------------------|------|---------------------------|------|-----------------------|-------|---------------------------|-------|
|                                                                                                            | <u>Viable/Control</u> |      | <u>Viable/HIC control</u> |      | <u>Viable/Control</u> |       | <u>Viable/HIC control</u> |       |
|                                                                                                            | FC                    | FDR  | FC                        | FDR  | FC                    | FDR   | FC                        | FDR   |
| <b>mmu-miR-423-3p</b>                                                                                      | -1.39                 | 0.17 | -1.47                     | 0.19 | -2.18                 | 0.00* | -2.05                     | 0.00* |
| <b>mmu-miR-425-5p</b>                                                                                      | -1.53                 | 0.21 | -1.79                     | 0.17 | -2.19                 | 0.01* | -2.37                     | 0.00* |
| <b>mmu-miR-429-3p</b>                                                                                      | -1.23                 | 0.54 | -1.38                     | 0.37 | -2.35                 | 0.02* | -2.20                     | 0.02* |
| <b>mmu-miR-433-5p</b>                                                                                      | 5.73                  | 0.11 | 4.74                      | 0.16 | 9.06                  | 0.00* | 8.26                      | 0.00* |
| <b>mmu-miR-451a</b>                                                                                        | -4.81                 | 0.16 | -5.58                     | 0.16 | -17.6                 | 0.01* | -6.24                     | 0.01* |
| <b>mmu-miR-455-3p</b>                                                                                      | -3.00                 | 0.11 | -2.64                     | 0.16 | -4.79                 | 0.01* | -4.34                     | 0.00* |
| <b>mmu-miR-465b-5p</b>                                                                                     | 1.72                  | 0.17 | 1.85                      | 0.17 | 2.92                  | 0.00* | 2.77                      | 0.00* |
| <b>mmu-miR-466a-3p/<br/>mmu-miR-466b-3p/<br/>mmu-miR-466c-3p/<br/>mmu-miR-466e-3p/<br/>mmu-miR-466p-3p</b> | -2.34                 | 0.16 | -1.96                     | 0.2  | -2.98                 | 0.00* | -3.02                     | 0.00* |
| <b>mmu-miR-466d-3p</b>                                                                                     | -2.37                 | 0.13 | -2.1                      | 0.17 | -3.05                 | 0.00* | -2.84                     | 0.00* |
| <b>mmu-miR-466f-3p</b>                                                                                     | -2.38                 | 0.17 | -1.71                     | 0.3  | -2.4                  | 0.02* | -2.37                     | 0.01* |
| <b>mmu-miR-466i-3p</b>                                                                                     | -2.52                 | 0.16 | -2.04                     | 0.21 | -3.09                 | 0.00* | -3.07                     | 0.00* |
| <b>mmu-miR-466i-5p</b>                                                                                     | -1.24                 | 0.38 | 1.34                      | 0.42 | 2.23                  | 0.04* | 1.82                      | 0.01* |
| <b>mmu-miR-466j</b>                                                                                        | -2.02                 | 0.16 | -1.68                     | 0.21 | -1.87                 | 0.01* | -1.75                     | 0.01* |
| <b>mmu-miR-466m-5p/<br/>mmu-miR-669m-5p</b>                                                                | -2.14                 | 0.16 | -1.71                     | 0.22 | -1.78                 | 0.02* | -1.7                      | 0.01* |
| <b>mmu-miR-466q</b>                                                                                        | -2.31                 | 0.17 | -1.75                     | 0.26 | -2.47                 | 0.01* | -2.49                     | 0.00* |
| <b>mmu-miR-467a-3p</b>                                                                                     | -2.25                 | 0.17 | -1.86                     | 0.24 | -2.7                  | 0.00* | -2.61                     | 0.00* |
| <b>mmu-miR-467c-3p</b>                                                                                     | -1.99                 | 0.16 | -1.69                     | 0.22 | -2.26                 | 0.01* | -2.31                     | 0.00* |
| <b>mmu-miR-467e-3p</b>                                                                                     | -2.25                 | 0.17 | -1.75                     | 0.27 | -2.29                 | 0.02* | -2.33                     | 0.01* |

|                        | 24 hours              |       |                           |      | 48 hours              |       |                           |       |
|------------------------|-----------------------|-------|---------------------------|------|-----------------------|-------|---------------------------|-------|
|                        | <u>Viable/Control</u> |       | <u>Viable/HIC control</u> |      | <u>Viable/Control</u> |       | <u>Viable/HIC control</u> |       |
|                        | FC                    | FDR   | FC                        | FDR  | FC                    | FDR   | FC                        | FDR   |
| <b>mmu-miR-467g</b>    | -2.58                 | 0.16  | -1.91                     | 0.24 | -2.69                 | 0.01* | -2.70                     | 0.00* |
| <b>mmu-miR-467h</b>    | -2.06                 | 0.16  | -1.6                      | 0.23 | -2                    | 0.01* | -1.96                     | 0.00* |
| <b>mmu-miR-487b-3p</b> | -1.45                 | 0.29  | -1.67                     | 0.21 | -2.45                 | 0.01* | -2.62                     | 0.00* |
| <b>mmu-miR-491-3p</b>  | -5.26                 | 0.29  | -5.54                     | 0.27 | -6.28                 | 0.22  | -9.34                     | 0.15  |
| <b>mmu-miR-497-5p</b>  | -2.26                 | 0.12  | -2.28                     | 0.16 | -3.97                 | 0.00* | -3.53                     | 0.00* |
| <b>mmu-miR-500-3p</b>  | -1.53                 | 0.21  | -1.59                     | 0.21 | -2.6                  | 0.00* | -2.36                     | 0.00* |
| <b>mmu-miR-5099</b>    | -1.75                 | 0.21  | -1.69                     | 0.24 | -3.93                 | 0.00* | -3.21                     | 0.00* |
| <b>mmu-miR-5113</b>    | 1.51                  | 0.21  | 2.1                       | 0.17 | 3.32                  | 0.01* | 2.84                      | 0.00* |
| <b>mmu-miR-5116</b>    | 1.68                  | 0.19  | 1.72                      | 0.2  | 2.62                  | 0.00* | 2.43                      | 0.00* |
| <b>mmu-miR-5120</b>    | 5.83                  | 0.11  | 5.24                      | 0.16 | 9.41                  | 0.00* | 8.52                      | 0.00* |
| <b>mmu-miR-5121</b>    | -2.32                 | 0.11  | -2.63                     | 0.16 | -3.38                 | 0.01* | -2.43                     | 0.03* |
| <b>mmu-miR-5125</b>    | 1.22                  | 0.35  | 1.48                      | 0.17 | 2.11                  | 0.00* | 2.07                      | 0.00* |
| <b>mmu-miR-542-5p</b>  | 2.36                  | 0.12  | 2.05                      | 0.17 | 2.54                  | 0.01* | 2.42                      | 0.00* |
| <b>mmu-miR-551b-5p</b> | 5.64                  | 0.11  | 4.6                       | 0.16 | 7.67                  | 0.00* | 7.13                      | 0.00* |
| <b>mmu-miR-5621-5p</b> | 1.71                  | 0.25  | 1.87                      | 0.19 | 3.06                  | 0.00* | 2.7                       | 0.00* |
| <b>mmu-miR-5622-5p</b> | -1.66                 | 0.17  | -1.57                     | 0.21 | -2.1                  | 0.00* | -2.08                     | 0.00* |
| <b>mmu-miR-5624-5p</b> | 1.12                  | 0.54  | 1.59                      | 0.17 | 2.09                  | 0.00* | 2.03                      | 0.00* |
| <b>mmu-miR-574-3p</b>  | -1.80                 | 0.17  | -1.73                     | 0.19 | -2.59                 | 0.00* | -2.58                     | 0.00* |
| <b>mmu-miR-592-3p</b>  | 9.11                  | 0.02* | 5.67                      | 0.12 | 7.09                  | 0.01* | 5.58                      | 0.02* |

|                                       | 24 hours              |      |                           |      | 48 hours              |       |                           |       |
|---------------------------------------|-----------------------|------|---------------------------|------|-----------------------|-------|---------------------------|-------|
|                                       | <u>Viable/Control</u> |      | <u>Viable/HIC control</u> |      | <u>Viable/Control</u> |       | <u>Viable/HIC control</u> |       |
|                                       | FC                    | FDR  | FC                        | FDR  | FC                    | FDR   | FC                        | FDR   |
| mmu-miR-652-3p                        | -1.68                 | 0.38 | -1.92                     | 0.29 | -4.14                 | 0.01* | -4.24                     | 0.01* |
| mmu-miR-665-5p                        | 2.32                  | 0.11 | 2.96                      | 0.16 | 4.51                  | 0.00* | 3.87                      | 0.00* |
| mmu-miR-669a-3-3p                     | -2.55                 | 0.16 | -1.92                     | 0.24 | -2.74                 | 0.01* | -2.73                     | 0.00* |
| mmu-miR-669a-3p/<br>mmu-miR-669o-3p   | -2.11                 | 0.17 | -1.67                     | 0.27 | -2.16                 | 0.02* | -2.23                     | 0.00* |
| mmu-miR-669b-3p                       | -3.15                 | 0.16 | -2.37                     | 0.21 | -4.27                 | 0.00* | -3.92                     | 0.00* |
| mmu-miR-669c-3p                       | -2.13                 | 0.17 | -1.62                     | 0.31 | -2.04                 | 0.04* | -2.07                     | 0.01* |
| mmu-miR-669c-5p                       | -1.14                 | 0.54 | 1.49                      | 0.27 | 2.23                  | 0.03* | 1.96                      | 0.01* |
| mmu-miR-669d-2-3p/<br>mmu-miR-669d-3p | -1.62                 | 0.21 | -1.36                     | 0.37 | -2.16                 | 0.01* | -1.95                     | 0.01* |
| mmu-miR-669e-3p                       | -1.82                 | 0.16 | -1.59                     | 0.22 | -2.16                 | 0.00* | -2.11                     | 0.00* |
| mmu-miR-669f-3p                       | -2.59                 | 0.16 | -1.97                     | 0.24 | -2.72                 | 0.01* | -2.7                      | 0.00* |
| mmu-miR-669i                          | -2.00                 | 0.13 | -1.61                     | 0.21 | -2.18                 | 0.01* | -2.02                     | 0.01* |
| mmu-miR-669l-3p                       | -2.21                 | 0.17 | -1.85                     | 0.22 | -2.93                 | 0.00* | -2.72                     | 0.00* |
| mmu-miR-669m-3p                       | -2.61                 | 0.12 | -2.09                     | 0.17 | -3.44                 | 0.00* | -2.92                     | 0.00* |
| mmu-miR-669n                          | -1.1                  | 0.68 | 1.5                       | 0.27 | 2.28                  | 0.03* | 2.04                      | 0.01* |
| mmu-miR-669p-3p                       | -2.05                 | 0.17 | -1.48                     | 0.37 | -1.86                 | 0.07  | -1.91                     | 0.01* |
| mmu-miR-674-5p                        | -1.52                 | 0.24 | -1.65                     | 0.22 | -2.22                 | 0.01* | -2.31                     | 0.01* |
| mmu-miR-676-3p                        | -1.71                 | 0.16 | -1.75                     | 0.17 | -2.63                 | 0.00* | -2.38                     | 0.00* |
| mmu-miR-677-3p                        | 8.84                  | 0.11 | 6.43                      | 0.16 | 15.98                 | 0.00* | 12.42                     | 0.00* |
| mmu-miR-705                           | 1.98                  | 0.13 | 1.88                      | 0.16 | 2.9                   | 0.00* | 2.93                      | 0.00* |

|                         | 24 hours              |      |                           |      | 48 hours              |       |                           |       |
|-------------------------|-----------------------|------|---------------------------|------|-----------------------|-------|---------------------------|-------|
|                         | <u>Viable/Control</u> |      | <u>Viable/HIC control</u> |      | <u>Viable/Control</u> |       | <u>Viable/HIC control</u> |       |
|                         | FC                    | FDR  | FC                        | FDR  | FC                    | FDR   | FC                        | FDR   |
| <b>mmu-miR-706</b>      | 1.32                  | 0.29 | 2.26                      | 0.17 | 3.94                  | 0.01* | 3.06                      | 0.00* |
| <b>mmu-miR-709</b>      | -2.35                 | 0.11 | -1.81                     | 0.16 | -1.9                  | 0.09  | -1.7                      | 0.14  |
| <b>mmu-miR-710</b>      | 3.71                  | 0.13 | 3.03                      | 0.17 | 5.35                  | 0.00* | 5.24                      | 0.00* |
| <b>mmu-miR-711</b>      | 4.66                  | 0.11 | 3.35                      | 0.16 | 5.45                  | 0.00* | 4.94                      | 0.00* |
| <b>mmu-miR-714</b>      | 1.68                  | 0.24 | 1.74                      | 0.23 | 2.21                  | 0.00* | 2.13                      | 0.00* |
| <b>mmu-miR-744-5p</b>   | -1.50                 | 0.16 | -1.35                     | 0.22 | -2.31                 | 0.00* | -2.23                     | 0.00* |
| <b>mmu-miR-763</b>      | 1.87                  | 0.17 | 1.8                       | 0.21 | 2.02                  | 0.02* | 1.96                      | 0.02* |
| <b>mmu-miR-872-3p</b>   | 1.36                  | 0.25 | 1.78                      | 0.16 | 2.38                  | 0.00* | 2.16                      | 0.00* |
| <b>mmu-miR-882</b>      | 3.32                  | 0.11 | 2.98                      | 0.16 | 4.59                  | 0.00* | 4.39                      | 0.00* |
| <b>mmu-miR-92a-2-5p</b> | 2.42                  | 0.12 | 2.00                      | 0.17 | 2.58                  | 0.00* | 2.55                      | 0.00* |
| <b>mmu-miR-92a-3p</b>   | -2.26                 | 0.21 | -2.79                     | 0.19 | -6.02                 | 0.00* | -5.49                     | 0.00* |
| <b>mmu-miR-93-5p</b>    | -1.95                 | 0.29 | -2.33                     | 0.22 | -4.72                 | 0.01* | -4.33                     | 0.01* |
| <b>mmu-miR-98-5p</b>    | -2.45                 | 0.19 | -2.29                     | 0.22 | -3.74                 | 0.02* | -4.07                     | 0.02* |
| <b>mmu-miR-99a-5p</b>   | -1.60                 | 0.29 | -1.72                     | 0.24 | -3.51                 | 0.01* | -3.3                      | 0.00* |
| <b>mmu-miR-99b-5p</b>   | -1.55                 | 0.36 | -1.64                     | 0.31 | -3.06                 | 0.01* | -3.23                     | 0.01* |

\*Red and blue values indicate up- and down-regulation, respectively. P-values  $\geq 0.05$  is considered significant.
