# Supplementary material
Source: PubMed Central journal article supplement (PMC5042847)
Supplement: NIHMS807316-supplement-Supp_Table_S3.pdf [file NIHMS807316-supplement-Supp_Table_S3.pdf]

**Supplemental Table 3**

| <b>Target</b> | <b>Full name</b>                                    | <b>Assay ID</b> |
|---------------|-----------------------------------------------------|-----------------|
| <i>Ccl1</i>   | Chemokine (C-C motif) ligand 1                      | Mm00441236_m1   |
| <i>Ccl11</i>  | Chemokine (C-C motif) ligand 11                     | Mm00441238_m1   |
| <i>Ccl5</i>   | Chemokine (C-C motif) ligand 5                      | Mm01302427_m1   |
| <i>Ccl7</i>   | Cchemokine (C-C motif) ligand 5                     | Mm00443113_m1   |
| <i>Clec7a</i> | C-type lectin domain family 7, member A             | Mm01183349_m1   |
| <i>Cxcl5</i>  | Chemokine (C-X-C Motif) ligand 5                    | Mm00436451_g1   |
| <i>Gapdh</i>  | Glyceraldehyde 3 phosphate dehydrogenase            | Mm99999915_g1   |
| <i>Gata3</i>  | GATA binding protein 3                              | Mm00484683_m1   |
| <i>Gfi1</i>   | Growth factor independent 1 transcription repressor | Mm00515855_m1   |
| <i>Il10</i>   | Interleukin 10                                      | Mm00439614_m1   |
| <i>Il12b</i>  | Interleukin 12b                                     | Mm00434174_m1   |
| <i>Il13</i>   | Interleukin 13                                      | Mm00434204_m1   |
| <i>Il18</i>   | Interleukin 18                                      | Mm00434225_m1   |
| <i>Il1rl1</i> | Interleukin 1 receptor-like 1                       | Mm00516117_m1   |
| <i>Il21</i>   | Interleukin 21                                      | Mm00517640_m1   |
| <i>Il22</i>   | Interleukin 22                                      | Mm04209823_mH   |
| <i>Il23a</i>  | Interleukin 23a                                     | Mm01160011_g1   |
| <i>Il4</i>    | Interleukin 4                                       | Mm00445259_m1   |
| <i>Il5</i>    | Interleukin 5                                       | Mm00439646_m1   |
| <i>Il6</i>    | Interleukin 6                                       | Mm00446190_m1   |
| <i>Il7r</i>   | Interleukin 7 receptor                              | Mm00434295_m1   |
| <i>Isg20</i>  | Interferon stimulated exonuclease gene 20 kDa       | Mm00469585_m1   |
| <i>Rorc</i>   | RAR-related orphan receptor C                       | Mm00441139_m1   |
| <i>Sftpd</i>  | Surfactant protein D                                | Mm00486060_m1   |
| <i>Socs1</i>  | Suppressor of cytokine signaling 1                  | Mm00782550_s1   |
| <i>Socs3</i>  | Suppressor of cytokine signaling 3                  | Mm00545913_s1   |
| <i>Socs5</i>  | Suppressor of cytokine signaling 5                  | Mm00465631_s1   |
| <i>Spp1</i>   | Secreted phosphoprotein 1                           | Mm00436767_m1   |
| <i>Stat6</i>  | Signal transducer and activator of transcription 6  | Mm01160477_m1   |
| <i>Tbx21</i>  | T-box 21                                            | Mm012994563_m1  |
| <i>Tlr4</i>   | Toll-like receptor 4                                | Mm00445273_m1   |
| <i>Tlr6</i>   | Toll-like receptor 6                                | Mm02529782_s1   |
| <i>Tnf</i>    | Tumor necrosis factor                               | Mm00443258_m1   |
| <i>Tnfsf4</i> | Tumor necrosis factor superfamily, member 4         | Mm00437215_m1   |
